# Supplementary material
Source: PubMed Central journal article supplement (PMC6863074)
Supplement: NIHMS1058246-supplement-SI.pdf [file NIHMS1058246-supplement-SI.pdf]

## Structure-Activity Relationship for the Oxadiazole Class of Antibiotics

*Edward Spink<sup>†§</sup>, Derong Ding<sup>†§</sup>, Zhihong Peng<sup>†</sup>, Marc A. Boudreau<sup>†</sup>, Erika Leemans<sup>†</sup>, Elena Lastochkin<sup>†</sup>, Wei Song<sup>†</sup>, Katerina Lichtenwalter<sup>†</sup>, Peter I. O'Daniel<sup>†</sup>, Sebastian A. Testero<sup>†</sup>, Hualiang Pi<sup>†</sup>, Valerie A. Schroeder<sup>‡</sup>, William R. Wolter<sup>‡</sup>, Nuno T. Antunes<sup>†</sup>, Mark A. Suckow<sup>‡</sup>, Sergei Vakulenko<sup>†</sup>, Mayland Chang<sup>†\*</sup>, Shahriar Mobashery<sup>†\*</sup>*

<sup>†</sup>Department of Chemistry and Biochemistry, University of Notre Dame, Notre Dame, IN 46556, USA. <sup>‡</sup>Freimann Life Sciences Center and Department of Biological Sciences, University of Notre Dame, Notre Dame, IN 46556, USA

<sup>§</sup>Authors contributed equally to this work

### Supporting Information

#### Contents

|                                                         |    |
|---------------------------------------------------------|----|
| Experimental Procedures.....                            | 2  |
| Table S1. Spectral data of final compounds.....         | 3  |
| Table S2. Minimal Inhibitory concentrations (MICs)..... | 29 |

## **Experimental Procedures**

### **General procedure for synthesis of benzoyl chlorides**

This has been previously described.<sup>1</sup>

### **General procedure for synthesis of heteroaryl acyl chlorides**

The carboxylic acid (1.0 equiv) was dissolved in thionyl chloride (25.0 equiv), and the mixture was heated to reflux for 2.5 h. The excess thionyl chloride was removed *in vacuo*, and the resulting solid was used without further purification.

### **General procedure for synthesis of diphenyl ethers, Method A (nucleophilic aromatic substitution)**

A 4-fluorobenzonitrile derivative (1.0 equiv.), a phenol derivative (1.0 equiv.), and  $K_2CO_3$  (2.0 equiv.) were dissolved in either DMSO or DMF, and the mixture was stirred at 100 °C for 16 h. The mixture was cooled to room temperature and was diluted with water (2x volume of DMSO or DMF used), then it was extracted with ethyl acetate (3x). The combined organic layer was washed with water (3x), then once with brine, and dried (anhydrous  $Na_2SO_4$ ). After being concentrated *in vacuo*, the crude material was purified by column chromatography on silica gel.

### **General procedure for synthesis of diphenyl ethers, Method B (Ullmann coupling)**

This has been previously described.<sup>1</sup>

### **General procedure for nitro reduction using Fe/HCl**

This has been previously described.<sup>1</sup>

### **General procedure for nitro reduction using $SnCl_2 \cdot H_2O$**

Using an adaptation of a literature procedure,<sup>2</sup> the starting material (1.0 equiv.) was dissolved in ethanol (6.0 mL/mmol starting material), and  $SnCl_2 \cdot 2H_2O$  (5.0 equiv.) was added. The mixture was stirred at 70 °C for 4 h, then cooled to room temperature and poured onto ice. The pH was adjusted to ~7-8 with saturated  $NaHCO_3$ , and the aqueous layer was extracted 3x with ethyl

acetate. The combined organic layers were dried (anhydrous Na<sub>2</sub>SO<sub>4</sub>), and the solvent was removed *in vacuo*. The crude product was purified by column chromatography on silica gel.

### General procedure for synthesis of *N*'-hydroxybenzimidamides

This was previously described.<sup>1</sup>

### General procedure for synthesis of allyl-protected phenols

Allyl-protected phenols **9**,<sup>3</sup> **12**,<sup>4</sup> **13**,<sup>5</sup> and **20**,<sup>6</sup> are known compounds, and were synthesized using previously described procedures.<sup>3</sup>

Compounds **52**, **14**, and **15** were synthesized using previously described procedures.<sup>1,7</sup>

**Table S1. Spectral data of final compounds**

| Compound Number     | Structure and data                                                                                                                                                                                                                                            |
|---------------------|---------------------------------------------------------------------------------------------------------------------------------------------------------------------------------------------------------------------------------------------------------------|
| 57a                 | 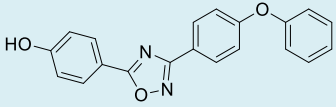<br>Lit. <sup>1</sup>                                                                                                                                                     |
| 57b                 | <br>Lit. <sup>1</sup>                                                                                                                                                     |
| 57c                 |                                                                                                                                                                           |
| <sup>1</sup> H NMR  | (500 MHz, DMSO- <i>d</i> <sub>6</sub> ) δ 6.99 (d, <i>J</i> = 8.6 Hz, 2H), 7.14 (d, <i>J</i> = 8.6 Hz, 2H), 7.19-7.22 (m, 2H), 7.28-7.32 (m, 2H), 8.02 (d, <i>J</i> = 8.6 Hz, 2H), 8.06 (d, <i>J</i> = 8.6 Hz, 2H).                                           |
| <sup>13</sup> C NMR | (125 MHz, DMSO- <i>d</i> <sub>6</sub> ) δ 114.1, 116.3, 116.9 (d, <i>J</i> <sub>CF</sub> = 23.3 Hz), 117.8, 121.0, 121.9 (d, <i>J</i> <sub>CF</sub> = 8.6 Hz), 129.2, 130.1, 151.3, 158.9 (d, <i>J</i> <sub>CF</sub> = 239.4 Hz), 160.1, 162.1, 167.5, 175.4. |
| <sup>19</sup> F NMR | (282 MHz, DMSO- <i>d</i> <sub>6</sub> ) δ -118.89.                                                                                                                                                                                                            |
| HRMS (ESI)          | calcd for C <sub>21</sub> H <sub>14</sub> FN <sub>2</sub> O <sub>3</sub> 349.0983, found 349.0978 [MH] <sup>+</sup>                                                                                                                                           |

|                     |                                                                                                                                                                                                                                                                                                      |
|---------------------|------------------------------------------------------------------------------------------------------------------------------------------------------------------------------------------------------------------------------------------------------------------------------------------------------|
| <b>58</b>           | 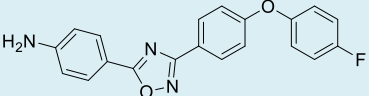                                                                                                                                                                                                                   |
| <sup>1</sup> H NMR  | (600 MHz, CDCl <sub>3</sub> ) δ 4.13 (s, 2H), 6.71 (d, <i>J</i> = 8.5 Hz, 2H), 7.04-7.10 (m, 6H), 8.00 (d, <i>J</i> = 8.5 Hz, 2H), 8.11 (d, <i>J</i> = 8.5 Hz, 2H).                                                                                                                                  |
| <sup>13</sup> C NMR | (125 MHz, DMSO- <i>d</i> <sub>6</sub> ) δ 114.0, 114.5, 116.6, 117.8, 121.3, 122.0, 129.3, 130.0, 150.6, 151.9, 158.3, 160.2, 168.1, 175.9.                                                                                                                                                          |
| HRMS (ESI)          | calcd for C <sub>20</sub> H <sub>15</sub> FN <sub>3</sub> O <sub>2</sub> 348.1143, found 348.11563 [MH] <sup>+</sup>                                                                                                                                                                                 |
| <b>58a</b>          |                                                                                                                                                                                                                    |
| <sup>1</sup> H NMR  | (600 MHz, acetone- <i>d</i> <sub>6</sub> ) δ 5.63 (br s, 2H), 6.84 (d, <i>J</i> = 8.8 Hz, 2H), 7.13 (d, <i>J</i> = 7.5 Hz, 2H), 7.14 (d, <i>J</i> = 8.8 Hz, 2H), 7.22 (t, <i>J</i> = 7.5 Hz, 1H), 7.45 (t, <i>J</i> = 7.5 Hz, 2H), 7.92 (d, <i>J</i> = 8.8 Hz, 2H), 8.13 (d, <i>J</i> = 8.8 Hz, 2H). |
| <sup>13</sup> C NMR | (150 MHz, acetone- <i>d</i> <sub>6</sub> ) δ 112.4, 114.8, 119.2, 120.6, 123.2, 125.2, 130.0, 130.7, 131.1, 154.2, 157.2, 161.0, 168.7, 177.2.                                                                                                                                                       |
| HRMS (ESI)          | calcd for C <sub>20</sub> H <sub>15</sub> N <sub>3</sub> O <sub>2</sub> 330.1237, found 330.1234 [MH] <sup>+</sup>                                                                                                                                                                                   |
| <b>58b</b>          | <br>Lit. <sup>1</sup>                                                                                                                                                                                            |
| <b>58c</b>          |                                                                                                                                                                                                                  |
| <sup>1</sup> H NMR  | (600 MHz, CDCl <sub>3</sub> ) δ 4.13 (s, 2H), 6.71 (d, <i>J</i> = 8.5 Hz, 2H), 7.04-7.10 (m, 6H), 8.00 (d, <i>J</i> = 8.5 Hz, 2H), 8.11 (d, <i>J</i> = 8.5 Hz, 2H).                                                                                                                                  |
| <sup>13</sup> C NMR | (125 MHz, DMSO- <i>d</i> <sub>6</sub> ) δ 114.0, 114.5, 116.6, 117.8, 121.3, 122.0, 129.3, 130.0, 150.6, 151.9, 158.3, 160.2, 168.1, 175.9.                                                                                                                                                          |
| <sup>19</sup> F NMR | (282 MHz, CDCl <sub>3</sub> ) δ -119.3                                                                                                                                                                                                                                                               |
| HRMS (ESI)          | calcd for C <sub>20</sub> H <sub>15</sub> FN <sub>3</sub> O <sub>2</sub> 348.1143, found 348.11563 [MH] <sup>+</sup>                                                                                                                                                                                 |
| <b>59b</b>          |                                                                                                                                                                                                                  |

|                     |                                                                                                                                                                                                                                                                  |
|---------------------|------------------------------------------------------------------------------------------------------------------------------------------------------------------------------------------------------------------------------------------------------------------|
| <sup>1</sup> H NMR  | (400 MHz, DMSO- <i>d</i> <sub>6</sub> ) δ 5.90 (br s, 3H), 6.81 (d, <i>J</i> = 8.6 Hz, 2H), 7.28 (d, <i>J</i> = 9.0 Hz, 2H), 7.29 (d, <i>J</i> = 8.6 Hz, 2H), 7.79 (d, <i>J</i> = 8.6 Hz, 2H), 7.88 (d, <i>J</i> = 8.6 Hz, 2H), 8.11 (d, <i>J</i> = 9.0 Hz, 2H). |
| <sup>13</sup> C NMR | (100 MHz, DMSO- <i>d</i> <sub>6</sub> ) δ 110.7, 114.5, 119.1, 119.8, 124.1 (q, <i>J</i> <sub>CF</sub> = 286.8 Hz), 124.2 (q, <i>J</i> <sub>CF</sub> = 32.5 Hz), 127.6 (q, <i>J</i> <sub>CF</sub> = 3.8 Hz), 129.3, 129.6, 157.9, 159.3, 167.2, 175.9.           |
| HRMS (ESI)          | calcd for C <sub>21</sub> H <sub>14</sub> F <sub>3</sub> N <sub>3</sub> O <sub>2</sub> 398.1111, found 398.1131 [MH] <sup>+</sup>                                                                                                                                |
| <b>60a</b>          | 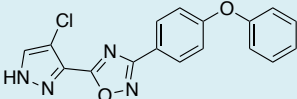                                                                                                                                                                               |
| <sup>1</sup> H NMR  | (400 MHz, DMSO- <i>d</i> <sub>6</sub> ) δ 7.16-7.20 (m, 4H), 7.26 (t, <i>J</i> = 7.4 Hz, 1H), 7.48 (t, <i>J</i> = 7.6 Hz, 2H), 8.11 (d, <i>J</i> = 8.4 Hz, 1H), 8.39 (s, 1H), 14.27 (s, 1H).                                                                     |
| <sup>13</sup> C NMR | (100 MHz, DMSO- <i>d</i> <sub>6</sub> ) δ 110.3, 118.3, 119.7, 120.6, 124.5, 129.3, 130.3 (2C), 133.5, 155.4, 159.8, 167.5, 169.3.                                                                                                                               |
| HRMS (ESI)          | calcd for C <sub>17</sub> H <sub>11</sub> ClN <sub>4</sub> O <sub>2</sub> 339.0643, found 339.0652 [MH] <sup>+</sup>                                                                                                                                             |
| <b>60b</b>          |                                                                                                                                                                              |
| <sup>1</sup> H NMR  | (400 MHz, CDCl <sub>3</sub> ) δ 7.16-7.19 (m, 4H), 7.66 (d, <i>J</i> = 8.8 Hz, 2H), 8.02 (s, 1H), 8.17-8.20 (m, 2H), 13.58 (br s, 1H).                                                                                                                           |
| <sup>13</sup> C NMR | (100 MHz, DMSO- <i>d</i> <sub>6</sub> ) δ 110.8, 119.8, 120.6, 122.6, 124.8, 125.1, 128.3 (q, <i>J</i> <sub>CF</sub> = 3.6 Hz), 130.1, 130.9, 134.1, 158.8, 159.9, 168.0, 170.2.                                                                                 |
| HRMS (ESI)          | calcd for C <sub>18</sub> H <sub>11</sub> ClF <sub>3</sub> N <sub>4</sub> O <sub>2</sub> 407.0517, found 407.0540 [MH] <sup>+</sup>                                                                                                                              |
| <b>60c</b>          |                                                                                                                                                                              |
| <sup>1</sup> H NMR  | (400 MHz, CDCl <sub>3</sub> ) δ 7.07-7.13 (m, 6H), 7.91 (s, 1H), 8.16 (d, <i>J</i> = 9.2 Hz, 2H).                                                                                                                                                                |
| <sup>13</sup> C NMR | (100 MHz, DMSO- <i>d</i> <sub>6</sub> ) δ 110.1, 116.8, 117.0, 117.9, 120.6, 121.8, 121.9, 129.3, 130.3, 133.5, 151.2, 151.3, 157.6, 160.0, 160.2, 167.4, 169.4.                                                                                                 |
| HRMS (ESI)          | calcd for C <sub>17</sub> H <sub>11</sub> ClFN <sub>4</sub> O <sub>2</sub> 357.0549, found 357.0544 [MH] <sup>+</sup>                                                                                                                                            |
| <b>61a</b>          |                                                                                                                                                                              |

|                     |                                                                                                                                                                                               |
|---------------------|-----------------------------------------------------------------------------------------------------------------------------------------------------------------------------------------------|
| <sup>1</sup> H NMR  | (400 MHz, CDCl <sub>3</sub> ) δ 7.10–7.14 (m, 4H), 7.20–7.22 (m, 1H), 7.39–7.44 (m, 2H), 7.97 (s, 1H), 8.15–8.18 (m, 2H).                                                                     |
| <sup>13</sup> C NMR | (100 MHz, DMSO- <i>d</i> <sub>6</sub> ) δ 94.1, 117.9, 118.4, 119.7, 120.6, 124.5, 129.3, 130.0, 130.3, 132.7, 155.4, 159.8, 167.4.                                                           |
| HRMS (ESI)          | calcd for C <sub>17</sub> H <sub>12</sub> BrN <sub>4</sub> O <sub>2</sub> 383.0138, found 383.0120 [MH] <sup>+</sup>                                                                          |
| <b>61b</b>          | 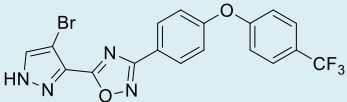                                                                                                            |
| <sup>1</sup> H NMR  | (400 MHz, DMSO- <i>d</i> <sub>6</sub> ) δ 7.28–7.34 (m, 4H), 7.80 (d, <i>J</i> = 8.8 Hz, 2H), 8.14–8.16 (m, 2H), 8.38 (s, 1H).                                                                |
| <sup>13</sup> C NMR | (100 MHz, DMSO- <i>d</i> <sub>6</sub> ) δ 94.2, 119.1, 120.0, 122.0, 124.1, 124.4, 127.7 (q, <i>J</i> <sub>CF</sub> = 3.6), 129.5, 132.7, 135.1, 158.2, 159.2, 167.4, 169.8.                  |
| HRMS (ESI)          | calcd for C <sub>18</sub> H <sub>11</sub> BrF <sub>3</sub> N <sub>4</sub> O <sub>2</sub> 451.0012, found 450.9986 [MH] <sup>+</sup>                                                           |
| <b>62a</b>          |                                                                                                             |
| <sup>1</sup> H NMR  | (400 MHz, CDCl <sub>3</sub> ) δ 7.11–7.15 (m, 4H), 7.18–7.22 (m, 1H), 7.39–7.44 (m, 2H), 8.05 (s, 1H), 8.05–8.18 (m, 2H).                                                                     |
| <sup>13</sup> C NMR | (100 MHz, DMSO- <i>d</i> <sub>6</sub> ) δ 60.7, 119.0, 120.3, 121.2, 125.3, 129.9, 131.0, 138.2, 138.9, 156.0, 160.5, 168.1, 170.7.                                                           |
| HRMS (ESI)          | calcd for C <sub>17</sub> H <sub>12</sub> IN <sub>4</sub> O <sub>2</sub> 430.9999, found 430.9982 [MH] <sup>+</sup>                                                                           |
| <b>62b</b>          |                                                                                                           |
| <sup>1</sup> H NMR  | (400 MHz, DMSO- <i>d</i> <sub>6</sub> ) δ 7.29–7.36 (m, 4H), 7.80 (d, <i>J</i> = 8.8 Hz, 2H), 8.16 (d, <i>J</i> = 8.4 Hz, 2H), 8.31 (s, 1H).                                                  |
| <sup>13</sup> C NMR | (100 MHz, DMSO- <i>d</i> <sub>6</sub> ) δ 60.4, 119.1, 120.0, 122.1, 122.8, 124.1, 124.4, 125.5, 127.6 (q, <i>J</i> <sub>CF</sub> = 3.5 Hz), 129.4, 137.4, 138.3, 158.1, 159.2, 167.3, 170.4. |
| HRMS (ESI)          | calcd for C <sub>18</sub> H <sub>11</sub> F <sub>3</sub> IN <sub>4</sub> O <sub>2</sub> 498.9873, found 498.9879 [MH] <sup>+</sup>                                                            |
| <b>63a</b>          |                                                                                                           |

|                     |                                                                                                                                                        |
|---------------------|--------------------------------------------------------------------------------------------------------------------------------------------------------|
| <sup>1</sup> H NMR  | (400 MHz, CD <sub>3</sub> OD) δ 7.12-7.14 (m, 4H), 7.20-7.24 (m, 1H), 7.41-7.45 (m, 2H), 8.12-8.15 (m, 2H), 8.82(s, 1H).                               |
| <sup>13</sup> C NMR | (100 MHz, DMSO- <i>d</i> <sub>6</sub> ) δ 119.0, 120.5, 120.8, 125.3, 130.0, 131.0, 133.0, 134.8, 155.9, 160.8, 168.4, 169.2.                          |
| HRMS (ESI)          | calcd for C <sub>17</sub> H <sub>11</sub> N <sub>5</sub> O <sub>4</sub> 372.0703, found 372.0707.                                                      |
| <b>63c</b>          | 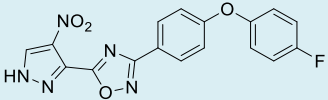                                                                     |
| <sup>1</sup> H NMR  | (500 MHz, DMSO- <i>d</i> <sub>6</sub> ) δ 7.12-7.33 (m, 6H), 8.08 ( <i>t</i> , <i>J</i> = 8.8 Hz, 2H), 9.2 (s, 1H).                                    |
| <sup>13</sup> C NMR | (100 MHz, DMSO- <i>d</i> <sub>6</sub> ) δ 116.8, 117.0, 117.9, 120.1, 122.0, 129.3, 132.5, 134.1, 151.2, 157.7, 160.1, 160.4, 167.7, 168.5             |
| HRMS (ESI)          | calcd for C <sub>17</sub> H <sub>11</sub> FN <sub>5</sub> O <sub>4</sub> 368.0790, found 368.0790 [MH] <sup>+</sup>                                    |
| <b>64a</b>          |                                                                      |
| <sup>1</sup> H NMR  | (400 MHz, CDCl <sub>3</sub> ) δ 4.31 (br s, 2H), 7.09-7.12 (m, 4H), 7.18-7.22 (m, 1H), 7.39-7.43 (m, 3H), 8.12-8.14 (m, 2H).                           |
| <sup>13</sup> C NMR | (100 MHz, DMSO- <i>d</i> <sub>6</sub> ) δ 115.1, 118.3, 119.7, 121.0, 124.3, 124.5, 129.3, 130.3, 133.8, 155.5, 159.7, 166.8, 171.1.                   |
| HRMS (ESI)          | calcd for C <sub>17</sub> H <sub>14</sub> N <sub>5</sub> O <sub>2</sub> [M+H] <sup>+</sup> 320.1142, found 320.1158.                                   |
| <b>64c</b>          |                                                                    |
| <sup>1</sup> H NMR  | (400 MHz, CDCl <sub>3</sub> ) δ 6.79 (d, <i>J</i> = 8.8 Hz, 2H), 6.99-7.09 (m, 4H), 7.21 (s, 1H), 7.76 (d, <i>J</i> = 8.8 Hz, 2H).                     |
| <sup>13</sup> C NMR | (400 MHz, CDCl <sub>3</sub> ) δ 116.7, 116.9, 117.5, 118.1, 121.0, 121.6, 121.7, 124.1, 129.3, 132.3, 151.6, 151.7, 158.3, 160.4, 160.7, 167.4, 169.9. |
| HRMS (ESI)          | calcd for C <sub>17</sub> H <sub>13</sub> FN <sub>5</sub> O <sub>2</sub> 338.1048, found 338.1038 [MH] <sup>+</sup>                                    |
| <b>65a</b>          |                                                                    |

|                     |                                                                                                                                                                                                              |
|---------------------|--------------------------------------------------------------------------------------------------------------------------------------------------------------------------------------------------------------|
| <sup>1</sup> H NMR  | (400 MHz, CDCl <sub>3</sub> ) δ 1.32 (s, 3H), 1.33 (s, 3H), 3.48-3.55 (m, 1H), 7.10-7.12 (m, 4H), 7.18-7.21 (m, 1H), 7.38-7.43 (m, 2H), 7.49 (s, 1H), 8.12-8.15 (m, 2H)                                      |
| <sup>13</sup> C NMR | (100 MHz, CDCl <sub>3</sub> ) δ 23.2, 47.8, 115.9, 118.4, 120.0, 121.5, 123.0, 124.4, 129.5, 130.1, 135.5, 156.2, 160.5, 167.8, 170.5.                                                                       |
| HRMS (ESI)          | calcd for C <sub>20</sub> H <sub>20</sub> N <sub>5</sub> O <sub>2</sub> [M+H] <sup>+</sup> 362.1612, found 362.1630.                                                                                         |
| <b>67b</b>          | 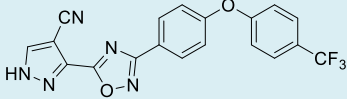                                                                                                                           |
| <sup>1</sup> H NMR  | (400 MHz, CDCl <sub>3</sub> ) δ 7.14-7.19 (m, 4H), 7.63-7.66 (m, 2H), 8.21-8.23 (m, 2H), 8.33 (s, 1H).                                                                                                       |
| <sup>13</sup> C NMR | (100 MHz, DMSO- <i>d</i> <sub>6</sub> ) δ 95.4, 111.4, 119.3, 119.8, 121.7, 126.1, 126.4, 127.6 (q, <i>J</i> <sub>CF</sub> = 4 Hz), 130.0, 137.4, 139.4, 159.3, 159.5, 167.9, 168.8.                         |
| HRMS (ESI)          | calcd for C <sub>19</sub> H <sub>11</sub> F <sub>3</sub> N <sub>5</sub> O <sub>2</sub> 398.0859, found 398.0824 [MH] <sup>+</sup>                                                                            |
| <b>69b</b>          |                                                                                                                            |
| <sup>1</sup> H NMR  | (400 MHz, DMSO- <i>d</i> <sub>6</sub> ) δ 6.96 (d, <i>J</i> = 8.4 Hz, 1H), 7.16-7.18 (m, 2H), 7.27-7.29 (m, 2H), 7.51-7.55 (m, 2H), 7.99-8.01 (m, 2H), 8.10-8.12 (m, 2H).                                    |
| <sup>13</sup> C NMR | (100 MHz, DMSO- <i>d</i> <sub>6</sub> ) δ 114.9, 115.4, 117.0, 119.8, 120.5, 121.2, 123.2, 123.5, 124.8, 125.1, 126.2, 126.3 (q, <i>J</i> = 3.6 Hz), 130.0, 146.6, 151.4, 158.7, 160.0, 168.1, 176.4.        |
| HRMS (ESI)          | calcd for C <sub>21</sub> H <sub>13</sub> F <sub>3</sub> N <sub>2</sub> O <sub>4</sub> 415.0900, found 415.0900 [MH] <sup>+</sup>                                                                            |
| <b>69c</b>          |                                                                                                                          |
| <sup>1</sup> H NMR  | (400 MHz, DMSO- <i>d</i> <sub>6</sub> ) δ 6.95 (d, <i>J</i> = 8.4 Hz, 1H), 7.11-7.14 (m, 2H), 7.19-7.23 (m, 2H), 7.28-7.32 (m, 2H), 7.50-7.54 (m, 2H), 8.04-8.06 (m, 2H), 9.68 (br s, 1H), 10.06 (br s, 1H). |
| <sup>13</sup> C NMR | (100 MHz, DMSO- <i>d</i> <sub>6</sub> ) δ 114.3, 114.7, 116.3, 116.8, 117.0, 117.8, 120.5, 121.1, 121.8, 121.9, 129.2, 146.0, 150.7, 151.3, 151.4, 157.6, 160.0, 167.5, 175.6.                               |
| HRMS (ESI)          | calcd for C <sub>20</sub> H <sub>14</sub> FN <sub>2</sub> O <sub>4</sub> 365.0932, found 365.0929 [MH] <sup>+</sup>                                                                                          |
| <b>70a</b>          |                                                                                                                          |



|                     |                                                                                                                                                                                                                                                                                                                                                                                   |
|---------------------|-----------------------------------------------------------------------------------------------------------------------------------------------------------------------------------------------------------------------------------------------------------------------------------------------------------------------------------------------------------------------------------|
| <sup>1</sup> H NMR  | (500 MHz, CDCl <sub>3</sub> ) δ 7.07-7.11 (m, 3H), 7.14 (t, <i>J</i> = 8.5 Hz, 1H), 7.18 (t, <i>J</i> = 7.4 Hz, 1H), 7.37-7.41 (m, 3H), 7.89-7.94 (m, 2H), 8.11 (d, <i>J</i> = 8.8 Hz, 2H).                                                                                                                                                                                       |
| HRMS (ESI)          | calcd for C <sub>20</sub> H <sub>14</sub> FN <sub>2</sub> O <sub>3</sub> 349.0983, found 349.0974 [MH] <sup>+</sup>                                                                                                                                                                                                                                                               |
| <b>70c</b>          | 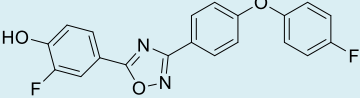                                                                                                                                                                                                                                                                                                |
| <sup>1</sup> H NMR  | (500 MHz, CD <sub>3</sub> OD) δ 7.03 (d, <i>J</i> = 9.0 Hz, 2H), 7.06-7.11 (m, 3H), 7.13-7.17 (m, 2H), 7.81-7.84 (m, 2H), 8.04 (d, <i>J</i> = 9.0 Hz, 2H).                                                                                                                                                                                                                        |
| <sup>13</sup> C NMR | (125 MHz, DMSO- <i>d</i> <sub>6</sub> ) δ 116.0, 117.0, 117.7, 118.9, 119.6, 122.8, 122.9, 126.5, 130.4, 151.4, 152.9, 153.4, 161.0, 162.2, 169.6, 176.4.                                                                                                                                                                                                                         |
| <sup>19</sup> F NMR | (282 MHz, CD <sub>3</sub> OD) δ -121.2, -137.9.                                                                                                                                                                                                                                                                                                                                   |
| HRMS (ESI)          | calcd for C <sub>20</sub> H <sub>13</sub> F <sub>2</sub> N <sub>2</sub> O <sub>3</sub> 367.0889, found 367.0889 [MH] <sup>+</sup>                                                                                                                                                                                                                                                 |
| <b>71c</b>          |                                                                                                                                                                                                                                                                                                 |
| <sup>1</sup> H NMR  | (500 MHz, CD <sub>3</sub> OD) δ 7.09 (d, <i>J</i> = 8.5 Hz, 2H), 7.13-7.17 (m, 4H), 7.78 (d, <i>J</i> = 8.5 Hz, 2H), 8.10 (d, <i>J</i> = 9.0 Hz, 2H).                                                                                                                                                                                                                             |
| <sup>13</sup> C NMR | (125 MHz, CD <sub>3</sub> OD) δ 113.1, 115.4 (t, <i>J</i> <sub>CF</sub> = 9.6 Hz), 115.8 (d, <i>J</i> <sub>CF</sub> = 23.8 Hz), 119.0, 122.6, 122.9 (d, <i>J</i> <sub>CF</sub> = 8.3 Hz), 130.5, 140.6, 154.1 (dd, <i>J</i> <sub>CF</sub> = 242.8, 7.0 Hz), 153.4 (d, <i>J</i> <sub>CF</sub> = 2.5 Hz), 161.0 (d, <i>J</i> <sub>CF</sub> = 240.3 Hz), 162.3, 169.8, 175.7.        |
| <sup>19</sup> F NMR | (282 MHz, CD <sub>3</sub> OD) δ -121.2, -134.0.                                                                                                                                                                                                                                                                                                                                   |
| HRMS (ESI)          | calcd for C <sub>20</sub> H <sub>12</sub> F <sub>3</sub> N <sub>2</sub> O <sub>3</sub> 385.0795, found 385.0770 [MH] <sup>+</sup>                                                                                                                                                                                                                                                 |
| <b>72a</b>          |                                                                                                                                                                                                                                                                                               |
| <sup>1</sup> H NMR  | (500 MHz, CDCl <sub>3</sub> ) δ 4.23 (br s, 2H), 6.85 (t, <i>J</i> = 8.6 Hz, 1H), 7.07-7.10 (m, 4H), 7.17 (t, <i>J</i> = 7.4 Hz, 1H), 7.38 (dd, <i>J</i> = 8.6, 7.6 Hz, 2H), 7.80-7.84 (m, 2H), 8.10 (d, <i>J</i> = 9.0 Hz, 2H).                                                                                                                                                  |
| <sup>13</sup> C NMR | (125 MHz, CDCl <sub>3</sub> ) δ 114.2 (d, <i>J</i> <sub>CF</sub> = 8.2 Hz), 115.4 (d, <i>J</i> <sub>CF</sub> = 20.6 Hz), 116.3 (d, <i>J</i> <sub>CF</sub> = 3.3 Hz), 118.5, 119.9, 121.9, 124.3, 125.6 (d, <i>J</i> <sub>CF</sub> = 3.3 Hz), 129.4, 130.1, 139.4 (d, <i>J</i> <sub>CF</sub> = 12.3 Hz), 150.8 (d, <i>J</i> <sub>CF</sub> = 240.3 Hz), 156.3, 160.2, 168.4, 175.2. |
| <sup>19</sup> F NMR | (282 MHz, CDCl <sub>3</sub> ) δ -135.26 (dd, <i>J</i> = 11.0, 8.6 Hz).                                                                                                                                                                                                                                                                                                            |
| HRMS (ESI)          |                                                                                                                                                                                                                                                                                                                                                                                   |

|                     |                                                                                                                                                                                                                                                                                                                                                                                                                                                                                                                                          |
|---------------------|------------------------------------------------------------------------------------------------------------------------------------------------------------------------------------------------------------------------------------------------------------------------------------------------------------------------------------------------------------------------------------------------------------------------------------------------------------------------------------------------------------------------------------------|
|                     | calcd for C <sub>20</sub> H <sub>15</sub> FN <sub>3</sub> O <sub>2</sub> 348.1143, 348.1117 found [MH] <sup>+</sup>                                                                                                                                                                                                                                                                                                                                                                                                                      |
| <b>72b</b>          | 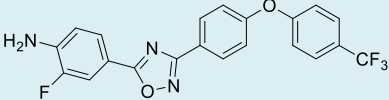                                                                                                                                                                                                                                                                                                                                                                                                                                                       |
| <sup>1</sup> H NMR  | (500 MHz, CDCl <sub>3</sub> ) δ 4.25 (br s, 2H), 6.85 (t, <i>J</i> = 8.6 Hz, 1H), 7.12-7.16 (m, 4H), 7.62 (d, <i>J</i> = 8.6 Hz, 2H), 7.80-7.84 (m, 2H), 8.16 (d, <i>J</i> = 8.8 Hz, 2H).                                                                                                                                                                                                                                                                                                                                                |
| <sup>13</sup> C NMR | (125 MHz, CDCl <sub>3</sub> ) δ 114.1 (d, <i>J</i> <sub>CF</sub> = 8.2 Hz), 115.4 (d, <i>J</i> <sub>CF</sub> = 21.4 Hz), 116.3 (d, <i>J</i> <sub>CF</sub> = 4.1 Hz), 118.9, 119.7, 123.3, 124.3 (q, <i>J</i> <sub>CF</sub> = 271.6 Hz), 125.6 (d, <i>J</i> <sub>CF</sub> = 2.5 Hz), 125.9 (q, <i>J</i> <sub>CF</sub> = 32.9 Hz), 129.7, 139.5 (d, <i>J</i> <sub>CF</sub> = 12.3 Hz), 150.8 (d, <i>J</i> <sub>CF</sub> = 240.3 Hz), 158.6, 159.7 (d, <i>J</i> <sub>CF</sub> = 1.6 Hz), 168.3, 175.4 (d, <i>J</i> <sub>CF</sub> = 2.5 Hz). |
| <sup>19</sup> F NMR | (282 MHz, CDCl <sub>3</sub> ) δ -135.22 (dd, 1F, <i>J</i> = 12.2, 8.6 Hz), -62.21 (s, 3F).                                                                                                                                                                                                                                                                                                                                                                                                                                               |
| <b>73b</b>          |                                                                                                                                                                                                                                                                                                                                                                                                                                                        |
| <sup>1</sup> H NMR  | (400 MHz, CDCl <sub>3</sub> ) δ 7.13-7.17 (m, 4H), 7.64 (d, <i>J</i> = 8.5 Hz, 2H), 7.78 (dd, <i>J</i> = 6.7, 1.5 Hz, 2H), 8.16 (d, <i>J</i> = 9.0 Hz, 2H).                                                                                                                                                                                                                                                                                                                                                                              |
| <sup>13</sup> C NMR | (100 MHz, CDCl <sub>3</sub> ) δ 112.3 (m), 119.0, 119.7, 122.8, 124.8, 126.0 (q, <i>J</i> <sub>CF</sub> = 32.9 Hz) 127.6 (q, <i>J</i> <sub>CF</sub> = 3.8 Hz), 129.7, 138.2, 139.1 (d, <i>J</i> <sub>CF</sub> = 15.8 Hz), 148.1, 152.7 (dd, <i>J</i> <sub>CF</sub> = 244.4, 6.8 Hz), 158.9, 168.5.                                                                                                                                                                                                                                       |
| HRMS (ESI)          | calcd for C <sub>21</sub> H <sub>11</sub> F <sub>5</sub> N <sub>2</sub> O <sub>3</sub> 435.0763, found 435.0735 [MH] <sup>+</sup>                                                                                                                                                                                                                                                                                                                                                                                                        |
| <b>74a</b>          |                                                                                                                                                                                                                                                                                                                                                                                                                                                      |
| <sup>1</sup> H NMR  | (400 MHz, CDCl <sub>3</sub> ) δ 4.18 (s, 2H), 6.36 (s, 1H), 6.74 (d, <i>J</i> = 8.6 Hz, 2H), 7.01-7.06 (m, 4H), 7.12-7.18 (m, 3H), 7.36 (m, 2H), 8.00 (d, 2H).                                                                                                                                                                                                                                                                                                                                                                           |
| <sup>13</sup> C NMR | (100 MHz, CDCl <sub>3</sub> ) δ 32.4, 116.1, 118.5, 120.0, 121.1, 124.4, 125.3, 129.4, 130.2, 130.4, 155.6, 156.1, 160.5, 168.0, 178.8.                                                                                                                                                                                                                                                                                                                                                                                                  |
| HRMS (ESI)          | calcd for C <sub>21</sub> H <sub>16</sub> N <sub>2</sub> O <sub>3</sub> 345.1234, found 345.1211 [MH] <sup>+</sup>                                                                                                                                                                                                                                                                                                                                                                                                                       |
| <b>75a</b>          |                                                                                                                                                                                                                                                                                                                                                                                                                                                      |

|                     |                                                                                                                                                                                                                                                                                                                                             |
|---------------------|---------------------------------------------------------------------------------------------------------------------------------------------------------------------------------------------------------------------------------------------------------------------------------------------------------------------------------------------|
| <sup>1</sup> H NMR  | (400 MHz, DMSO- <i>d</i> <sub>6</sub> ) δ 6.68 (m, 1H), 7.14–7.18 (m, 4H), 7.24 (tt, <i>J</i> = 7.5, 1.2 Hz), 7.47 (m, 2H), 7.55 (t, <i>J</i> = 2.8 Hz, 1H), 7.63 (d, <i>J</i> = 8.5 Hz, 1H), 7.91 (dd <i>J</i> = 8.5, 1.7 Hz), 8.11 (d, <i>J</i> = 8.9 Hz), 8.46 (m, 1H), 11.64 (s, 1H).                                                   |
| <sup>13</sup> C NMR | (100 MHz, DMSO- <i>d</i> <sub>6</sub> ) δ 102.7, 112.5, 114.2, 118.3, 119.7, 120.6, 121.2, 121.2, 124.5, 127.8, 129.2, 130.3, 138.4, 155.4, 159.7, 167.6, 170.9, 176.8.                                                                                                                                                                     |
| HRMS (ESI)          | calcd for C <sub>22</sub> H <sub>15</sub> N <sub>3</sub> O <sub>2</sub> 354.1237, found 354.1273 [MH] <sup>+</sup>                                                                                                                                                                                                                          |
| <b>75b</b>          | 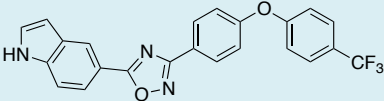                                                                                                                                                                                                                                                          |
| <sup>1</sup> H NMR  | (400 MHz, CDCl <sub>3</sub> ) δ 6.71 (m, 1H), 7.13 (d, <i>J</i> = 8.7 Hz, 2H), 7.16 (d, <i>J</i> = 8.9 Hz, 2H), 7.32 (d, <i>J</i> = 8.7 Hz, 2H), 7.52 (d, <i>J</i> = 8.6 Hz, 1H), 7.63 (d, <i>J</i> = 8.9 Hz, 2H), 8.06 (d,d, <i>J</i> = 8.6, 1.61 Hz, 1H), 8.22 (d, <i>J</i> = 8.9 Hz, 2H), 8.52 (s, 1H), 8.57 (t, <i>J</i> = 0.8 Hz, 1H). |
| <sup>13</sup> C NMR | (100 MHz, CDCl <sub>3</sub> ) δ 104.3, 119.9, 116.3, 118.9, 119.8, 122.2, 122.4, 123.5, 124.3 (q, <i>J</i> <sub>CF</sub> = 272.2 Hz), 125.9 (q, <i>J</i> <sub>CF</sub> = 33.2 Hz), 126.2, 127.52 (q, <i>J</i> <sub>CF</sub> = 3.8 Hz), 128.2, 129.7, 138.3, 158.5, 159.8, 168.3, 177.4.                                                     |
| <sup>19</sup> F NMR | (376 MHz, CDCl <sub>3</sub> ) δ 99.90 (s, 3F).                                                                                                                                                                                                                                                                                              |
| HRMS (ESI)          | calcd for C <sub>23</sub> H <sub>14</sub> F <sub>3</sub> N <sub>3</sub> O <sub>2</sub> 422.1111, found 422.1146 [MH] <sup>+</sup>                                                                                                                                                                                                           |
| <b>75c</b>          |                                                                                                                                                                                                                                                         |
| <sup>1</sup> H NMR  | (400 MHz, DMSO- <i>d</i> <sub>6</sub> ) δ 6.68 (m, 1H), 7.15 (d, <i>J</i> = 8.8 Hz, 2H), 7.12–7.16 (m, 2H), 7.29–7.33 (m, 2H), 7.55 (t, <i>J</i> = 2.8 Hz, 1H), 7.66 (d, <i>J</i> = 8.5 Hz, 1H), 7.91 (dd <i>J</i> = 8.5, 1.6 Hz), 8.10 (d, <i>J</i> = 8.8 Hz, 2H), 8.46 (m, 1H), 11.64 (s, 1H).                                            |
| <sup>13</sup> C NMR | (100 MHz, DMSO- <i>d</i> <sub>6</sub> ) δ 102.7, 112.5, 114.1, 116.8, 117.0, 117.9, 120.5, 121.1, 121.2, 121.9 (d, <i>J</i> <sub>CF</sub> = 8.6 Hz), 127.8, 129.2, 138.4, 151.4, 160.0, 167.5, 176.8.                                                                                                                                       |
| HRMS (ESI)          | calcd for C <sub>22</sub> H <sub>14</sub> FN <sub>3</sub> O <sub>2</sub> 371.1143, found 372.1166 [MH] <sup>+</sup>                                                                                                                                                                                                                         |
| <b>76c</b>          |                                                                                                                                                                                                                                                         |

|                     |                                                                                                                                                                                                                    |
|---------------------|--------------------------------------------------------------------------------------------------------------------------------------------------------------------------------------------------------------------|
| <sup>1</sup> H NMR  | (400 MHz, DMSO- <i>d</i> <sub>6</sub> ) δ 7.12-7.14 (m, 2H), 7.19-7.22 (m, 2H), 7.28-7.32 (m, 2H), 7.98 (s, 1H), 8.04-8.06 (m, 2H), 8.23 (s, 1H), 12.98 (s, 1H).                                                   |
| <sup>13</sup> C NMR | (100 MHz, DMSO- <i>d</i> <sub>6</sub> ) δ 116.8, 117.0, 117.8, 121.0, 121.8, 121.9, 122.8, 125.9, 129.2, 138.2, 151.3, 151.4, 157.7, 160.0, 167.3, 171.9.                                                          |
| HRMS (ESI)          | calcd for C <sub>17</sub> H <sub>12</sub> FN <sub>4</sub> O <sub>2</sub> 323.0939, found 323.0948 [MH] <sup>+</sup>                                                                                                |
| <b>77b</b>          | 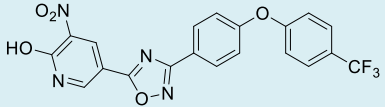                                                                                                                                 |
| <sup>1</sup> H NMR  | (400 MHz, DMSO- <i>d</i> <sub>6</sub> ) δ 7.29–7.31 (m, 4H), 7.81 (d, <i>J</i> = 8.8 Hz, 2H), 8.13 (d, <i>J</i> = 8.8 Hz, 2H), 8.78 (d, <i>J</i> = 2.4 Hz, 1H), 8.90 (d, <i>J</i> = 2.4 Hz, 1H), 13.76 (br s, 1H); |
| <sup>13</sup> C NMR | (100 MHz, DMSO- <i>d</i> <sub>6</sub> ) δ 101.3, 119.3, 119.8, 121.7, 124.2, 124.5, 127.70 (q, <i>J</i> <sub>CF</sub> = 4.0 Hz), 129.5, 136.9, 138.0, 145.0, 154.1, 158.3, 159.1, 167.5, 172.2.                    |
| HRMS (ESI)          | calcd for C <sub>20</sub> H <sub>12</sub> F <sub>3</sub> N <sub>4</sub> O <sub>5</sub> 445.0754, found 445.0742 [MH] <sup>+</sup>                                                                                  |
| <b>77c</b>          |                                                                                                                                 |
| <sup>1</sup> H NMR  | (400 MHz, DMSO- <i>d</i> <sub>6</sub> ) δ 7.09-7.33 (m, 6H), 8.03-8.08 (m, 2H), 8.73-8.90 (m, 2H), 13.73 (br s, 1H).                                                                                               |
| <sup>13</sup> C NMR | (100 MHz, DMSO- <i>d</i> <sub>6</sub> ) δ 101.9, 117.5, 117.7, 118.4, 121.0, 122.6, 122.7, 129.9, 137.5, 138.6, 145.6, 151.8, 151.9, 154.8, 158.3, 160.7, 161.0, 168.2, 172.7.                                     |
| HRMS (ESI)          | calcd for C <sub>19</sub> H <sub>12</sub> FN <sub>4</sub> O <sub>5</sub> 395.0786, found 395.0779 [MH] <sup>+</sup>                                                                                                |
| <b>78b</b>          |                                                                                                                                |
| <sup>1</sup> H NMR  | (400 MHz, CDCl <sub>3</sub> ) δ 7.14-7.18 (m, 4H), 7.64-7.67 (m, 3H), 7.91-7.92 (m, 1H), 8.11-8.15 (m, 2H), 9.66 (br, 1H).                                                                                         |
| <sup>13</sup> C NMR | (100 MHz, DMSO- <i>d</i> <sub>6</sub> ) δ 109.8, 117.6, 120.0, 120.4, 122.4, 123.5, 124.9, 125.3, 126.1, 126.2, 128.3 (q, <i>J</i> <sub>CF</sub> = 3.6 Hz), 130.1, 138.3, 159.0, 159.8, 168.1, 169.1.              |
| HRMS (ESI)          | calcd for C <sub>19</sub> H <sub>11</sub> F <sub>3</sub> N <sub>4</sub> O <sub>4</sub> 417.0805, found 417.0805 [MH] <sup>+</sup>                                                                                  |
| <b>78c</b>          |                                                                                                                                |

|                     |                                                                                                                                                                                                                                                                                                                                                                                                                                       |
|---------------------|---------------------------------------------------------------------------------------------------------------------------------------------------------------------------------------------------------------------------------------------------------------------------------------------------------------------------------------------------------------------------------------------------------------------------------------|
| <sup>1</sup> H NMR  | (400 MHz, CDCl <sub>3</sub> ) δ 7.05-7.11 (m, 6H), 7.62-7.63 (m, 1H), 7.89-7.91 (m, 1H), 8.04-8.07 (m, 2H), 9.66 (br, 1H).                                                                                                                                                                                                                                                                                                            |
| <sup>13</sup> C NMR | (100 MHz, DMSO- <i>d</i> <sub>6</sub> ) δ 109.7, 117.4, 117.6(2C), 118.4, 121.1, 122.5, 122.6, 126.0, 129.8, 138.2, 151.8, 151.9, 158.3, 160.7, 160.9, 168.1, 168.9.                                                                                                                                                                                                                                                                  |
| HRMS (ESI)          | calcd for C <sub>20</sub> H <sub>11</sub> FN <sub>4</sub> O <sub>4</sub> Na 389.0657, found 389.0654 [MNa] <sup>+</sup>                                                                                                                                                                                                                                                                                                               |
| <b>79a</b>          | 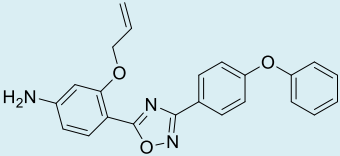                                                                                                                                                                                                                                                                                                                                                    |
| <sup>1</sup> H NMR  | (600 MHz, CDCl <sub>3</sub> ) δ 4.12 (br s, 2H), 4.65-4.67 (m, 2H), 5.36 (ddd, <i>J</i> = 10.9, 3.2, 1.8 Hz, 1H), 5.72 (ddd, <i>J</i> = 17.3, 3.5, 1.8 Hz, 1H), 6.12 (ddd, <i>J</i> = 17.3, 10.9, 4.7 Hz, 1H), 6.27 (d, <i>J</i> = 2.2 Hz, 1H), 6.37 (dd, <i>J</i> = 8.5, 2.2 Hz, 1H), 7.07-7.09 (m, 4H), 7.17 (dt, <i>J</i> = 7.5, 1.2 Hz, 1H), 7.37-7.40 (m, 2H), 8.00 (d, <i>J</i> = 8.5 Hz, 1H), 8.13 (d, <i>J</i> = 8.8 Hz, 2H). |
| <sup>13</sup> C NMR | (150 MHz, CDCl <sub>3</sub> ) δ 69.4, 98.9, 104.1, 107.7, 117.6, 118.5, 119.9, 122.5, 124.2, 129.4, 130.1, 132.6, 133.4, 152.2, 156.5, 159.5, 159.9, 167.7, 175.5.                                                                                                                                                                                                                                                                    |
| HRMS (ESI)          | calcd for C <sub>23</sub> H <sub>19</sub> N <sub>3</sub> NaO <sub>3</sub> 408.1319, found 408.1319 [MNa] <sup>+</sup>                                                                                                                                                                                                                                                                                                                 |
| <b>80a</b>          |                                                                                                                                                                                                                                                                                                                                                   |
| <sup>1</sup> H NMR  | (600 MHz, acetone- <i>d</i> <sub>6</sub> ) δ 7.12-7.16 (m, 2H), 7.15 (d, <i>J</i> = 9.0 Hz, 2H), 7.23 (tt, <i>J</i> = 7.4, 1.0 Hz, 1H), 7.42-7.47 (m, 4H), 8.14 (d, <i>J</i> = 9.0 Hz, 2H), 8.29 (dd, <i>J</i> = 8.8, 5.3 Hz, 2H).                                                                                                                                                                                                    |
| <sup>13</sup> C NMR | (125 MHz, acetone- <i>d</i> <sub>6</sub> ) δ 117.5 (d, <i>J</i> <sub>CF</sub> = 22.4 Hz), 119.2, 120.7, 121.7 (d, <i>J</i> <sub>CF</sub> = 2.8 Hz), 122.4, 125.3, 130.1, 131.1, 131.7 (d, <i>J</i> <sub>CF</sub> = 9.5 Hz), 157.0, 161.4, 166.5 (d, <i>J</i> <sub>CF</sub> = 253.0 Hz), 169.2, 175.7.                                                                                                                                 |
| HRMS (ESI)          | calcd for C <sub>20</sub> H <sub>14</sub> FN <sub>2</sub> O <sub>2</sub> 333.1034, found 333.1004 [MH] <sup>+</sup>                                                                                                                                                                                                                                                                                                                   |
| <b>80b</b>          | <br>Lit. <sup>1</sup>                                                                                                                                                                                                                                                                                                                             |
| <b>81b</b>          |                                                                                                                                                                                                                                                                                                                                                   |

|                     |                                                                                                                                                                                                                                                                   |
|---------------------|-------------------------------------------------------------------------------------------------------------------------------------------------------------------------------------------------------------------------------------------------------------------|
| <sup>1</sup> H NMR  | (600 MHz, acetone- <i>d</i> <sub>6</sub> ) δ 7.28-7.30 (m, 4H), 7.79 (d, <i>J</i> = 8.2 Hz, 2H), 7.86 (d, <i>J</i> = 8.2 Hz, 2H), 8.15 (d, <i>J</i> = 8.8 Hz, 2H), 8.20 (d, <i>J</i> = 8.8 Hz, 2H).                                                               |
| <sup>13</sup> C NMR | (150 MHz, acetone- <i>d</i> <sub>6</sub> ) δ 120.1, 120.7, 123.7, 124.2, 125.4 (q, <i>J</i> <sub>CF</sub> = 271.0), 126.0, 128.3, 128.5 (q, <i>J</i> <sub>CF</sub> = 3.9 Hz), 130.4, 130.7, 133.6, 159.7, 160.7, 169.2, 176.0.                                    |
| HRMS (ESI)          | calcd for C <sub>21</sub> H <sub>13</sub> BrF <sub>3</sub> N <sub>2</sub> O <sub>2</sub> 461.0107, found 461.0091 [MH] <sup>+</sup>                                                                                                                               |
| <b>81c</b>          | 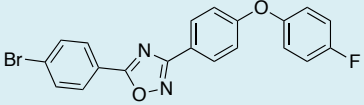                                                                                                                                                                                |
| <sup>1</sup> H NMR  | (400 MHz, CDCl <sub>3</sub> ) δ 7.00–7.05 (m, 6H), 7.65 (d, <i>J</i> = 8.4 Hz, 2H), 8.01–8.08 (m, 4H).                                                                                                                                                            |
| <sup>13</sup> C NMR | (100 MHz, CDCl <sub>3</sub> ) δ 116.7, 116.9, 118.0, 121.5, 121.6, 121.7, 123.4, 127.9, 129.6, 129.8, 132.7, 151.9 (2C), 158.4, 160.9, 168.7, 175.0.                                                                                                              |
| HRMS (ESI)          | calcd for C <sub>20</sub> H <sub>12</sub> BrFN <sub>2</sub> O <sub>2</sub> 411.0139, found 411.0139 [MH] <sup>+</sup>                                                                                                                                             |
| <b>83b</b>          |                                                                                                                                                                                |
| <sup>1</sup> H NMR  | (600 MHz, acetone- <i>d</i> <sub>6</sub> ) δ 2.15 (s, 3H, CH <sub>3</sub> ), 7.29-7.32 (m, 4H, ArH),                                                                                                                                                              |
| HRMS (ESI)          | calcd for C <sub>23</sub> H <sub>17</sub> F <sub>3</sub> N <sub>3</sub> O <sub>3</sub> 440.1217, found 440.1233 [MH] <sup>+</sup>                                                                                                                                 |
| <b>85c</b>          |                                                                                                                                                                               |
| <sup>1</sup> H NMR  | (400 MHz, CDCl <sub>3</sub> ) δ 1.35 (t, <i>J</i> = 7.2 Hz, 6H), 4.10-4.19 (m, 4H), 7.04-7.09 (m, 6H), 7.97-8.02 (m, 2H), 8.10-8.14 (m, 2H), 8.28-8.31 (m, 2H).                                                                                                   |
| <sup>13</sup> C NMR | (100 MHz, CDCl <sub>3</sub> ) δ 16.2, 16.3, 62.4, 62.5, 116.4, 116.7, 117.7, 121.1, 121.3, 121.4, 127.4, 127.8, 129.3, 132.2, 132.3, 132.4, 134.1, 151.6, 158.1, 160.5, 160.6, 168.5, 174.6.                                                                      |
| HRMS (ESI)          | calcd for C <sub>24</sub> H <sub>23</sub> FN <sub>2</sub> O <sub>5</sub> P 469.1323, found 469.1324 [MH] <sup>+</sup>                                                                                                                                             |
| <b>86b</b>          |                                                                                                                                                                               |
| <sup>1</sup> H NMR  | (600 MHz, CDCl <sub>3</sub> ) δ 3.14 (s, 3H), 6.76 (s, 1H), 7.14 (d, <i>J</i> = 8.5 Hz, 2H), 7.16 (d, <i>J</i> = 8.8 Hz, 2H), 7.37 (d, <i>J</i> = 8.8 Hz, 2H), 7.64 (d, <i>J</i> = 8.5 Hz, 2H), 8.18 (d, <i>J</i> = 8.8 Hz, 2H), 8.22 (d, <i>J</i> = 8.8 Hz, 2H). |
| HRMS (ESI)          | calcd for C <sub>22</sub> H <sub>17</sub> F <sub>3</sub> N <sub>3</sub> O <sub>4</sub> S 476.0886, found 476.0909 [MH] <sup>+</sup>                                                                                                                               |

|                     |                                                                                                                                                                                                                                                                                                        |
|---------------------|--------------------------------------------------------------------------------------------------------------------------------------------------------------------------------------------------------------------------------------------------------------------------------------------------------|
| <b>87b</b>          | 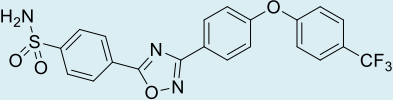                                                                                                                                                                                                                     |
| <sup>1</sup> H NMR  | (400 MHz, DMSO- <i>d</i> <sub>6</sub> ) δ 7.30–7.34 (m, 4H), 7.66 (s, 2H), 7.82 (d, <i>J</i> = 9.2 Hz, 2H), 8.08 (d, <i>J</i> = 8.4 Hz, 2H), 8.16–8.18 (m, 2H), 8.40 (d, <i>J</i> = 8.0 Hz, 2H).                                                                                                       |
| <sup>13</sup> C NMR | (100 MHz, DMSO- <i>d</i> <sub>6</sub> ) δ 120.0, 120.5, 122.5, 124.9, 126.2, 126.7, 127.5, 128.4 (q, <i>J</i> <sub>CF</sub> = 4.0 Hz), 129.5, 130.2, 148.6, 159.0, 159.8, 168.6, 175.1.                                                                                                                |
| HRMS (ESI)          | calcd for C <sub>21</sub> H <sub>15</sub> F <sub>3</sub> N <sub>3</sub> O <sub>4</sub> S 462.0730, found 462.0752 [MH] <sup>+</sup>                                                                                                                                                                    |
| <b>87c</b>          |                                                                                                                                                                                                                      |
| <sup>1</sup> H NMR  | (400 MHz, CD <sub>3</sub> OD) δ 7.06–7.18 (m, 6H), 8.10–8.12 (m, 4H), 8.35 (d, <i>J</i> = 6.8 Hz, 2H).                                                                                                                                                                                                 |
| <sup>13</sup> C NMR | (100 MHz, DMSO- <i>d</i> <sub>6</sub> ) δ 116.9, 117.1, 117.9, 120.5, 122.0, 122.1, 126.1, 126.9, 128.8, 129.4, 147.9, 151.3, 151.3, 157.8, 160.2, 160.4, 168.0, 174.4.                                                                                                                                |
| HRMS (ESI)          | calcd for C <sub>20</sub> H <sub>15</sub> FN <sub>3</sub> O <sub>4</sub> S 412.0762, found 412.0755 [MH] <sup>+</sup>                                                                                                                                                                                  |
| <b>88c</b>          |                                                                                                                                                                                                                    |
| <sup>1</sup> H NMR  | (500 MHz, DMSO- <i>d</i> <sub>6</sub> ) δ 6.41 (s, 2H), 7.16 (d, <i>J</i> = 8.8 Hz, 2H), 7.21–7.24 (m, 2H), 7.30–7.33 (m, 2H), 8.10–8.13 (m, 4H), 8.26 (d, <i>J</i> = 8.2 Hz, 2H).                                                                                                                     |
| <sup>13</sup> C NMR | (125 MHz, DMSO- <i>d</i> <sub>6</sub> ) δ 116.9 (d, <i>J</i> <sub>CF</sub> = 23.9 Hz), 117.9, 120.5, 121.9 (d, <i>J</i> <sub>CF</sub> = 8.2 Hz), 125.5, 127.9, 128.6, 129.3, 138.3, 151.2 (d, <i>J</i> <sub>CF</sub> = 2.5 Hz), 158.9 (d, <i>J</i> <sub>CF</sub> = 241.1), 160.3, 166.8, 167.9, 174.8. |
| HRMS (ESI)          | calcd for C <sub>21</sub> H <sub>15</sub> FN <sub>3</sub> O <sub>3</sub> 376.1092, found 376.1091 [MH] <sup>+</sup>                                                                                                                                                                                    |
| <b>89c</b>          |                                                                                                                                                                                                                    |
| <sup>1</sup> H NMR  | (500 MHz, DMSO- <i>d</i> <sub>6</sub> ) δ 7.15 (d, <i>J</i> = 9.0 Hz, 2H), 7.13 (dd, <i>J</i> = 8.9, 4.5 Hz, 2H), 7.31 (t, <i>J</i> = 8.9 Hz, 2H), 8.10 (d, <i>J</i> = 9.0 Hz, 2H), 8.18 (d, <i>J</i> = 8.8 Hz, 2H), 8.30 (d, <i>J</i> = 8.8 Hz, 2H).                                                  |
| <sup>13</sup> C NMR | (125 MHz, DMSO- <i>d</i> <sub>6</sub> ) δ 116.9, 117.9, 120.5, 121.9, 126.8, 128.2, 129.3, 130.3, 134.7, 151.2, 158.9, 160.3, 166.4, 167.9, 174.6.                                                                                                                                                     |
| <sup>19</sup> F NMR | (282 MHz, DMSO- <i>d</i> <sub>6</sub> ): δ -118.8.                                                                                                                                                                                                                                                     |

|                     |                                                                                                                                                                                                        |
|---------------------|--------------------------------------------------------------------------------------------------------------------------------------------------------------------------------------------------------|
| HRMS (ESI)          | calcd for C <sub>21</sub> H <sub>12</sub> FN <sub>2</sub> Na <sub>2</sub> O <sub>4</sub> 421.0571, found 421.0572 [MH] <sup>+</sup>                                                                    |
| <b>90c</b>          | 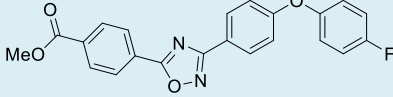                                                                                                                     |
| <sup>1</sup> H NMR  | (500 MHz, CDCl <sub>3</sub> ) δ 3.98 (s, 3H), 7.05-7.11 (m, 6H), 8.14 (d, <i>J</i> = 9.0 Hz, 2H), 8.22 (d, <i>J</i> = 8.4 Hz, 2H), 8.29 (d, <i>J</i> = 8.4 Hz, 2H).                                    |
| <sup>13</sup> C NMR | (125 MHz, DMSO- <i>d</i> <sub>6</sub> ) δ 52.5, 116.6, 117.8, 121.2, 121.4, 127.9, 128.1, 129.4, 130.2, 133.7, 151.7, 159.3, 160.6, 166.0, 168.6, 174.7.                                               |
| <sup>19</sup> F NMR | (282 MHz, CDCl <sub>3</sub> ): δ -119.0.                                                                                                                                                               |
| HRMS (ESI)          | calcd for C <sub>22</sub> H <sub>16</sub> FN <sub>2</sub> O <sub>4</sub> 391.1089, found 391.1099 [MH] <sup>+</sup>                                                                                    |
| <b>91c</b>          |                                                                                                                      |
| <sup>1</sup> H NMR  | (400 MHz, CDCl <sub>3</sub> ) δ 7.06-7.13 (m, 6H), 7.36-7.39 (m, 1H), 8.12-8.15 (m, 2H), 8.40-8.42 (m, 1H), 9.00-9.01 (m, 1H), 10.95 (s, 1H).                                                          |
| <sup>13</sup> C NMR | (100 MHz, DMSO- <i>d</i> <sub>6</sub> ) δ 114.9, 117.4, 117.7, 118.5, 121.0, 121.2, 122.5, 122.6, 126.1, 129.9, 134.5, 138.0, 152.0, 156.4, 158.3, 160.7, 160.8, 168.4, 174.4.                         |
| HRMS (ESI)          | calcd for C <sub>20</sub> H <sub>13</sub> FN <sub>3</sub> O <sub>5</sub> 394.0834, found 394.0834 [MH] <sup>+</sup>                                                                                    |
| <b>92c</b>          |                                                                                                                    |
| <sup>1</sup> H NMR  | (400 MHz, DMSO- <i>d</i> <sub>6</sub> ) δ 5.02 (br, 2H), 6.84 (d, <i>J</i> = 8.4 Hz, 1H), 7.12-7.14 (m, 2H), 7.19-7.22 (m, 2H), 7.27-7.33 (m, 3H), 7.42 (d, <i>J</i> = 2.0 Hz, 1H), 8.03-8.06 (m, 2H). |
| <sup>13</sup> C NMR | (100 MHz, DMSO- <i>d</i> <sub>6</sub> ) δ 113.3, 115.1(2C), 117.4, 117.7, 118.0, 118.5, 121.8, 122.5, 122.6, 129.8, 138.3, 149.5, 152.0 (2C), 158.3, 160.7 (2C), 168.1, 176.8.                         |
| HRMS (ESI)          | calcd for C <sub>20</sub> H <sub>15</sub> FN <sub>3</sub> O <sub>3</sub> 364.1097, found 364.1099 [MH] <sup>+</sup>                                                                                    |
| <b>94a</b>          |                                                                                                                    |



|                     |                                                                                                                                                                                                                                                                                                                  |
|---------------------|------------------------------------------------------------------------------------------------------------------------------------------------------------------------------------------------------------------------------------------------------------------------------------------------------------------|
| <sup>1</sup> H NMR  | (600 MHz, DMSO- <i>d</i> <sub>6</sub> ) δ 3.98 (s, 3H), 4.30 (s, 2H), 6.77 (d, <i>J</i> = 8.2 Hz, 1H), 7.08-7.11 (m, 4H), 7.17 (tt, <i>J</i> = 7.5, 1.0 Hz, 1H), 7.39 (dd, <i>J</i> = 7.5, 1.0 Hz, 2H), 7.58 (d, <i>J</i> = 1.8 Hz, 1H), 7.70 (dd, <i>J</i> = 8.2, 1.8 Hz, 1H), 8.12 (d, <i>J</i> = 9.1 Hz, 2H). |
| <sup>13</sup> C NMR | (150 MHz, DMSO- <i>d</i> <sub>6</sub> ) δ 56.0, 109.8, 113.8, 114.0, 118.6, 119.8, 122.2, 122.8, 124.2, 129.5, 130.1, 141.2, 146.8, 156.4, 160.1, 168.4, 176.3.                                                                                                                                                  |
| HRMS (ESI)          | calcd for C <sub>21</sub> H <sub>18</sub> N <sub>3</sub> O <sub>3</sub> 360.1343, found 360.1362 [MH] <sup>+</sup>                                                                                                                                                                                               |
| <b>95a</b>          | 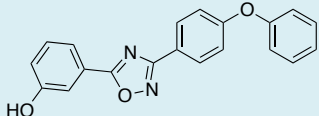                                                                                                                                                                                                                               |
| <sup>1</sup> H NMR  | (400 MHz, DMSO- <i>d</i> <sub>6</sub> ) δ 7.12 (m, 1H), 7.14-7.19 (m, 4H), 7.25 (tt, <i>J</i> = 7.5, 1.1 Hz, 1H), 7.45-7.50 (m, 3H), 7.56 (m, 1H), 7.62 (m, 1H), 8.09 (d, <i>J</i> = 8.9 Hz), 10.10 (s, H).                                                                                                      |
| <sup>13</sup> C NMR | (100 MHz, DMSO- <i>d</i> <sub>6</sub> ) δ 114.1, 118.3, 118.6, 119.8, 120.5, 120.8, 124.4, 124.6, 129.2, 130.4, 130.9, 155.4, 158.0, 160.0, 167.8, 175.4.                                                                                                                                                        |
| HRMS (ESI)          | calcd for C <sub>20</sub> H <sub>14</sub> N <sub>2</sub> O <sub>3</sub> 331.1077, found 331.1104 [MH] <sup>+</sup>                                                                                                                                                                                               |
| <b>96a</b>          |                                                                                                                                                                                                                              |
| <sup>1</sup> H NMR  | (400 MHz, DMSO- <i>d</i> <sub>6</sub> ) δ 7.14-7.18 (m, 4H), 7.25 (t, d, <i>J</i> = 7.3, 0.8 Hz, 1H), 7.38 (dd, <i>J</i> = 8.2, 1.9 Hz, 1H), 7.48 (t, <i>J</i> = 7.7 Hz, 2H), 7.64 (d, <i>J</i> = 1.9 Hz, 1H), 7.98 (td, <i>J</i> = 8.2 Hz, 1H), 8.08 (d, <i>J</i> = 8.8 Hz, 2H).                                |
| <sup>13</sup> C NMR | (400 MHz, DMSO- <i>d</i> <sub>6</sub> ) δ 91.8, 113.0, 118.3, 119.8, 119.9, 120.6, 123.19, 124.3, 124.6, 129.2, 130.4, 140.3, 159.9, 170.7.                                                                                                                                                                      |
| HRMS (ESI)          | calcd for C <sub>20</sub> H <sub>13</sub> IN <sub>2</sub> O <sub>3</sub> 457.0044, found 457.0082 [MH] <sup>+</sup>                                                                                                                                                                                              |
| <b>97a</b>          |                                                                                                                                                                                                                              |
| <sup>1</sup> H NMR  | (400 MHz, CDCl <sub>3</sub> ) δ 7.05 (m, 1H), 7.09-7.14 (m, 4H), 7.15 (m, 1H), 7.20 (tt, <i>J</i> = 7.4, 1.1 Hz, 1H), 7.38-7.43 (m, 2H), 7.53 (m, 1H), 8.00 (dd, <i>J</i> = 8.0, 1.7 Hz, 1H), 8.09 (d, <i>J</i> = 9.0 Hz), 10.53 (s, 1H).                                                                        |
| <sup>13</sup> C NMR | (100 MHz, CDCl <sub>3</sub> ) δ 108.4, 118.0, 118.6, 120.2, 120.4, 122.5, 124.6, 128.1, 129.6, 130.3, 135.5, 156.1, 158.4, 160.9, 166.9, 174.4.                                                                                                                                                                  |
| HRMS (ESI)          | calcd for C <sub>20</sub> H <sub>14</sub> N <sub>2</sub> O <sub>3</sub> 323.1077, found 323.1105 [MH] <sup>+</sup>                                                                                                                                                                                               |

|                     |                                                                                                                                                                                                                                                                                                                           |
|---------------------|---------------------------------------------------------------------------------------------------------------------------------------------------------------------------------------------------------------------------------------------------------------------------------------------------------------------------|
| <b>98a</b>          | 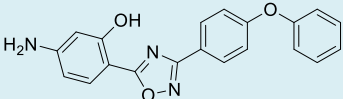                                                                                                                                                                                                                                        |
| <sup>1</sup> H NMR  | (600 MHz, CDCl <sub>3</sub> ) δ 4.17 (s, 2H), 6.31-6.33 (m, 2H), 7.08-7.10 (m, 4H), 7.19 (t, <i>J</i> = 7.4 Hz, 1H), 7.40 (dd, <i>J</i> = 7.4, 1.2 Hz, 2H), 7.76 (d, <i>J</i> = 8.8 Hz, 1H), 8.06 (d, <i>J</i> = 8.8 Hz, 2H), 10.59 (s, 1H).                                                                              |
| <sup>13</sup> C NMR | (150 MHz, CDCl <sub>3</sub> ) δ 99.3, 101.3, 108.1, 118.5, 120.0, 120.9, 124.5, 129.5, 129.7, 130.2, 153.2, 156.2, 160.3, 160.6, 166.4, 174.5.                                                                                                                                                                            |
| HRMS (ESI)          | calcd for C <sub>20</sub> H <sub>16</sub> N <sub>3</sub> O <sub>3</sub> 346.1186, found 346.1196 [MH] <sup>+</sup>                                                                                                                                                                                                        |
| <b>99a</b>          |                                                                                                                                                                                                                                         |
| <sup>1</sup> H NMR  | (500 MHz, CDCl <sub>3</sub> ) δ 4.08 (s, 3H), 7.08-7.11 (m, 2H), 7.10 (d, <i>J</i> = 9.0 Hz, 2H), 7.19 (tt, <i>J</i> = 7.5, 1.1 Hz, 1H), 7.27 (d, <i>J</i> = 8.8 Hz, 1H), 7.40 (dd, <i>J</i> = 7.4, 1.1 Hz, 2H), 8.12 (d, <i>J</i> = 9.0 Hz, 2H), 8.37 (dd, <i>J</i> = 8.8, 2.2 Hz, 1H), 8.71 (d, <i>J</i> = 2.2 Hz, 1H). |
| <sup>13</sup> C NMR | (150 MHz, CDCl <sub>3</sub> ) δ 57.2, 105.2, 114.3, 117.1, 118.5, 120.0, 121.2, 121.3, 124.5, 126.0, 129.5, 130.2, 133.7, 156.0, 160.6, 168.8, 173.6.                                                                                                                                                                     |
| HRMS (ESI)          | calcd for C <sub>21</sub> H <sub>16</sub> N <sub>3</sub> O <sub>5</sub> 390.1084, found 390.1068 [MH] <sup>+</sup>                                                                                                                                                                                                        |
| <b>99b</b>          |                                                                                                                                                                                                                                       |
| <sup>1</sup> H NMR  | (400 MHz, CDCl <sub>3</sub> ) δ 4.09 (s, 3H), 7.14-7.19 (m, 4H), 7.27-7.29 (m, 1H), 7.64-7.66 (m, 2H), 8.17-8.20 (m, 2H), 8.38 (dd, <i>J</i> = 2.0 Hz, 1H), 8.72 (d, <i>J</i> = 2.4 Hz, 1H).                                                                                                                              |
| <sup>13</sup> C NMR | (100 MHz, CDCl <sub>3</sub> ) δ 57.2, 114.3, 117.0, 119.1, 119.7, 122.7, 122.9, 125.6, 126.0, 126.3, 127.6 (q, <i>J</i> = 3.6 Hz), 129.8, 133.7, 140.2, 156.1, 159.0, 159.6, 168.7, 173.8.                                                                                                                                |
| HRMS (ESI)          | calcd for C <sub>22</sub> H <sub>15</sub> F <sub>3</sub> N <sub>3</sub> O <sub>5</sub> 458.0958, found 458.0960 [MH] <sup>+</sup>                                                                                                                                                                                         |
| <b>99c</b>          |                                                                                                                                                                                                                                       |
| <sup>1</sup> H NMR  | (400 MHz, CDCl <sub>3</sub> ) δ 4.13 (s, 3H), 7.09-7.17 (m, 5H), 7.30-7.33 (m, 2H), 8.15-8.18 (m, 2H), 8.41-8.43 (m, 1H), 8.76 (d, <i>J</i> = 2.0 Hz, 1H).                                                                                                                                                                |
| <sup>13</sup> C NMR | (100 MHz, CDCl <sub>3</sub> ) δ 57.2, 114.3, 116.7, 116.9, 117.1, 118.1, 121.4, 121.6, 121.7, 125.9, 129.6, 133.6, 140.2, 151.9, 152.0, 156.0, 158.4,                                                                                                                                                                     |

|                     |                                                                                                                                                                                                                           |
|---------------------|---------------------------------------------------------------------------------------------------------------------------------------------------------------------------------------------------------------------------|
| HRMS (ESI)          | 160.8, 160.9, 168.8, 173.6.<br>calcd for C <sub>21</sub> H <sub>14</sub> FN <sub>3</sub> NaO <sub>5</sub> 430.0810, found 430.0840 [MNa] <sup>+</sup>                                                                     |
| <b>100a</b>         | 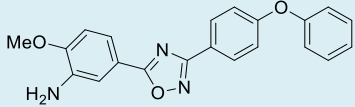                                                                                                                                        |
| <sup>1</sup> H NMR  | (600 MHz, DMSO- <i>d</i> <sub>6</sub> ) δ 3.88 (s, 3H), 7.02 (d, <i>J</i> = 8.5 Hz, 1H), 7.14-7.17 (m, 4H), 7.24 (tt, <i>J</i> = 7.4, 1.1 Hz, 1H), 7.39-7.41 (m, 1H), 7.45-7.49 (m, 3H), 8.06 (d, 2H, <i>J</i> = 8.8 Hz). |
| <sup>13</sup> C NMR | (150 MHz, DMSO- <i>d</i> <sub>6</sub> ) δ 55.6, 110.6, 111.7, 115.8, 116.8, 118.2, 119.8, 121.1, 124.5, 129.1, 130.3, 138.6, 150.2, 155.4, 160.0, 167.5, 175.9.                                                           |
| HRMS (ESI)          | calcd for C <sub>21</sub> H <sub>18</sub> N <sub>3</sub> O <sub>3</sub> 360.1343, found 360.1355 [MH] <sup>+</sup>                                                                                                        |
| <b>101b</b>         |                                                                                                                                         |
| <sup>1</sup> H NMR  | (400 MHz, CDCl <sub>3</sub> ) δ 3.99 (s, 3H), 4.03 (s, 3H), 7.02 (d, <i>J</i> = 8.8 Hz, 1H), 7.13-7.19 (m, 4H), 7.62-7.65 (m, 2H), 7.70 (d, <i>J</i> = 2.0 Hz, 1H), 7.85 (dd, <i>J</i> = 2.0 Hz, 1H), 8.19-8.21 (m, 2H).  |
| <sup>13</sup> C NMR | (100 MHz, CDCl <sub>3</sub> ) δ 56.3, 56.4, 110.8, 111.4, 117.1, 118.9, 119.7, 122.3, 122.9, 123.3, 125.7, 125.8, 126.1, 127.5 (q, <i>J</i> = 3.8 Hz), 129.7, 149.6, 153.2, 158.6, 159.7, 168.4, 175.9.                   |
| HRMS (ESI)          | calcd for C <sub>23</sub> H <sub>18</sub> F <sub>3</sub> N <sub>2</sub> O <sub>4</sub> 443.1213, found 443.1235 [MH] <sup>+</sup>                                                                                         |
| <b>101c</b>         |                                                                                                                                       |
| <sup>1</sup> H NMR  | (400 MHz, CDCl <sub>3</sub> ) δ 3.96 (s, 3H), 3.99 (s, 3H), 6.98 (d, <i>J</i> = 8.4 Hz, 1H), 7.03-7.10 (m, 5H), 7.67 (d, <i>J</i> = 2.0 Hz, 1H), 7.82 (dd, <i>J</i> = 2.0 Hz, 1H), 8.10-8.13 (m, 2H).                     |
| <sup>13</sup> C NMR | (100 MHz, CDCl <sub>3</sub> ) δ 56.3, 56.4, 110.7, 111.3, 116.7, 116.9, 117.1, 118.1, 121.5, 121.6, 121.9, 122.3, 129.5, 149.5, 152.0, 152.1, 153.1, 158.3, 160.6, 160.7, 168.5, 175.7.                                   |
| HRMS (ESI)          | calcd for C <sub>22</sub> H <sub>18</sub> FN <sub>2</sub> O <sub>4</sub> 393.1245, found 393.1264 [MH] <sup>+</sup>                                                                                                       |
| <b>102b</b>         |                                                                                                                                       |

|                     |                                                                                                                                                                                                                                 |
|---------------------|---------------------------------------------------------------------------------------------------------------------------------------------------------------------------------------------------------------------------------|
| <sup>1</sup> H NMR  | (400 MHz, CDCl <sub>3</sub> ) δ 7.15-7.19 (m, 5H), 7.65 (d, <i>J</i> = 8.8, 2H), 8.04 (d, <i>J</i> = 2.4 Hz, 1H), 8.20-8.22 (m, 2H).                                                                                            |
| <sup>13</sup> C NMR | (100 MHz, CDCl <sub>3</sub> ) δ 107.5, 119.2, 119.7, 122.7, 126.0, 126.3, 127.6 (q, <i>J</i> <sub>CF</sub> = 3.0 Hz), 129.8, 131.8, 137.6, 159.0, 159.5, 168.5, 170.9.                                                          |
| HRMS (ESI)          | calcd for C <sub>18</sub> H <sub>12</sub> F <sub>3</sub> N <sub>4</sub> O <sub>2</sub> 373.0907, found 373.0907 [MH] <sup>+</sup>                                                                                               |
| <b>102c</b>         | 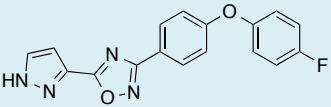                                                                                                                                              |
| <sup>1</sup> H NMR  | (400 MHz, CD <sub>3</sub> OD) δ 7.07-7.16 (m, 7H), 7.90 (s, 1H), 8.09-8.12 (m, 2H).                                                                                                                                             |
| <sup>13</sup> C NMR | (100 MHz, DMSO- <i>d</i> <sub>6</sub> ) δ 106.8, 116.8, 117.0, 117.8, 120.7, 121.9, 122.0, 129.2, 131.1, 136.8, 151.3, 157.6, 160.0, 160.2, 167.5, 171.3.                                                                       |
| HRMS (ESI)          | calcd for C <sub>17</sub> H <sub>12</sub> FN <sub>4</sub> O <sub>2</sub> 323.0939, found 323.0941 [MH] <sup>+</sup>                                                                                                             |
| <b>103b</b>         |                                                                                                                                               |
| <sup>1</sup> H NMR  | (400 MHz, DMSO- <i>d</i> <sub>6</sub> ) δ 4.37 (d, <i>J</i> = 6.0 Hz, 2H), 5.38 (t, <i>J</i> = 6.0 Hz, 1H), 7.29-7.33 (m, 4H), 7.81 (d, <i>J</i> = 8.4 Hz, 2H), 8.16 (d, <i>J</i> = 8.4 Hz, 2H), 8.37 (s, 1H).                  |
| <sup>13</sup> C NMR | (100 MHz, DMSO- <i>d</i> <sub>6</sub> ) δ 49.6, 73.9, 93.7, 103.5, 119.3, 119.8, 122.1, 124.2, 124.5, 127.7 (q, <i>J</i> <sub>CF</sub> = 3.5 Hz), 129.5, 134.6, 137.2, 158.2, 159.2, 167.4, 170.3.                              |
| HRMS (ESI)          | calcd for C <sub>21</sub> H <sub>14</sub> F <sub>3</sub> N <sub>4</sub> O <sub>3</sub> 427.1013, found 427.1013 [MH] <sup>+</sup>                                                                                               |
| <b>104b</b>         |                                                                                                                                             |
| <sup>1</sup> H NMR  | (400 MHz, CDCl <sub>3</sub> ) δ 0.98-1.01 (m, 3H), 1.44-1.50 (m, 2H), 1.67-1.75 (m, 2H), 3.20 (t, <i>J</i> = 8.0 Hz, 2H), 4.81 (br s, 1H), 7.14-7.18 (m, 4H), 7.43 (s, 1H), 7.64 (d, <i>J</i> = 8.0 Hz, 2H), 8.15-8.19 (m, 2H). |
| <sup>13</sup> C NMR | (100 MHz, CDCl <sub>3</sub> ) δ 14.1, 20.5, 31.9, 46.6, 119.1, 119.2, 119.6, 122.9, 125.9, 126.2, 127.6 (q, <i>J</i> <sub>CF</sub> = 3.6 Hz), 129.8, 136.9, 158.8, 159.5, 159.6, 167.6, 170.6.                                  |
| HRMS (ESI)          | calcd for C <sub>22</sub> H <sub>21</sub> F <sub>3</sub> N <sub>5</sub> O <sub>2</sub> 444.1642, found 444.1668 [MH] <sup>+</sup>                                                                                               |

|                                                                                         |                                                                                                                                                                                                                                                                                                                                                                                                                                                                                                                                                                                                                                                               |
|-----------------------------------------------------------------------------------------|---------------------------------------------------------------------------------------------------------------------------------------------------------------------------------------------------------------------------------------------------------------------------------------------------------------------------------------------------------------------------------------------------------------------------------------------------------------------------------------------------------------------------------------------------------------------------------------------------------------------------------------------------------------|
| <p><b>105b</b></p> <p><sup>1</sup>H NMR</p> <p><sup>13</sup>C NMR</p> <p>HRMS (ESI)</p> | 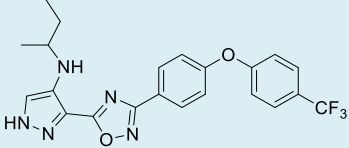 <p>(400 MHz, CDCl<sub>3</sub>) δ 1.02 (t, <i>J</i> = 7.2 Hz, 3H), 1.29 (d, <i>J</i> = 6.4 Hz, 4H), 1.58-1.76 (m, 2H), 3.28-3.33 (m, 1H), 7.14-7.18 (m, 4H), 7.45 (s, 1H), 7.64 (d, <i>J</i> = 8.4 Hz, 2H), 8.17-8.19 (m, 2H).</p> <p>(100 MHz, CDCl<sub>3</sub>) δ 10.4, 20.5, 29.8, 53.5, 116.3, 119.1, 119.7, 122.5, 122.9, 125.6, 125.9, 126.2, 127.6 (q, <i>J</i><sub>CF</sub> = 3.6 Hz), 129.8, 135.9, 158.9, 159.5, 167.6, 170.5.</p> <p>calcd for C<sub>22</sub>H<sub>21</sub>F<sub>3</sub>N<sub>5</sub>O<sub>2</sub> 444.1642, found 444.1647 [MH]<sup>+</sup></p> |
| <p><b>106b</b></p> <p><sup>1</sup>H NMR</p> <p><sup>13</sup>C NMR</p> <p>HRMS (ESI)</p> |  <p>(400 MHz, CDCl<sub>3</sub>) δ 1.36-1.45 (m, 5H), 1.64-1.82 (m, 3H), 2.10 (d, <i>J</i> = 10.4 Hz, 2H), 3.18 (br s, 1H), 4.90 (d, <i>J</i> = 3.2 Hz, 1H), 7.14-7.19 (m, 3H), 7.37 (s, 1H), 7.63-7.65 (m, 2H), 8.16-8.20 (m, 2H).</p> <p>(150 MHz, CDCl<sub>3</sub>) δ 24.8, 26.1, 33.4, 54.9, 115.9, 119.1, 119.6, 122.9, 125.6, 125.9, 126.2, 127.5 (q, <i>J</i><sub>CF</sub> = 3.6 Hz), 129.7, 135.6, 158.9, 159.5, 167.6, 170.7.</p> <p>calcd for C<sub>24</sub>H<sub>23</sub>F<sub>3</sub>N<sub>5</sub>O<sub>2</sub> 470.1798, found 470.1812 [MH]<sup>+</sup></p>    |
| <p><b>107b</b></p> <p><sup>1</sup>H NMR</p> <p><sup>13</sup>C NMR</p> <p>HRMS (ESI)</p> |  <p>(400 MHz, CDCl<sub>3</sub>) δ 1.59-1.71 (m, 4H), 1.77-1.82 (m, 2H), 2.01-2.07 (m, 2H), 3.73-3.75 (m, 1H), 4.87-4.88 (m, 1H), 7.14-7.17 (m, 3H), 7.36 (d, <i>J</i> = 1.2 Hz, 1H), 7.64 (d, <i>J</i> = 8.8 Hz, 2H), 8.15-8.18 (m, 2H).</p> <p>(100 MHz, CDCl<sub>3</sub>) δ 24.3, 33.7, 57.7, 116.4, 119.1, 119.6, 122.8, 125.6, 125.9, 126.2, 127.6 (q, <i>J</i><sub>CF</sub> = 3.7 Hz), 129.8, 136.2, 158.9, 159.5, 167.6, 170.5.</p> <p>calcd for C<sub>23</sub>H<sub>21</sub>F<sub>3</sub>N<sub>5</sub>O<sub>2</sub> 456.1642, found 456.1679 [MH]<sup>+</sup></p>  |
| <p><b>110b</b></p>                                                                      |                                                                                                                                                                                                                                                                                                                                                                                                                                                                                                                                                                           |

|                     |                                                                                                                                                                                                                                                                                        |
|---------------------|----------------------------------------------------------------------------------------------------------------------------------------------------------------------------------------------------------------------------------------------------------------------------------------|
| <sup>1</sup> H NMR  | (400 MHz, CDCl <sub>3</sub> ) δ 1.45-1.54 (m, 2H), 1.47 (s, 9H), 2.09-2.12 (m, 2H), 3.00-3.06 (m, 2H), 3.32-3.37 (m, 1H), 4.03 (br, 2H), 7.14-7.19 (m, 4H), 7.40 (s, 1H), 7.63-7.65 (m, 2H), 8.14-8.16 (m, 2H).                                                                        |
| <sup>13</sup> C NMR | (100 MHz, CDCl <sub>3</sub> ) δ 28.7, 32.4, 53.2, 80.0, 119.1, 119.2, 119.6, 122.6, 122.7, 122.9, 125.6, 126.0, 126.4, 127.6 (q, <i>J</i> = 4.4 Hz), 129.7, 134.9, 155.0, 159.0, 159.5, 167.6, 170.4.                                                                                  |
| HRMS (ESI)          | calcd for C <sub>28</sub> H <sub>30</sub> F <sub>3</sub> N <sub>6</sub> O <sub>4</sub> 571.2275, found 571.2261 [MH] <sup>+</sup>                                                                                                                                                      |
| <b>111b</b>         | 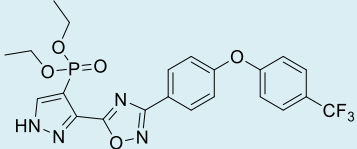                                                                                                                                                                                                     |
| <sup>1</sup> H NMR  | (400 MHz, CDCl <sub>3</sub> ) δ 1.23-1.26 (m, 6H), 4.09-4.20 (m, 4H), 7.02-7.10 (m, 4H), 7.60 (d, <i>J</i> = 8.4, 2H), 8.03-8.09 (m, 3H).                                                                                                                                              |
| <sup>13</sup> C NMR | (100 MHz, CDCl <sub>3</sub> ) δ 16.5, 16.6, 63.2, 63.3, 108.1, 110.3, 119.2, 119.7, 122.5, 122.9, 125.6, 126.0, 126.3, 127.6 (q, <i>J</i> <sub>CF</sub> = 3.6 Hz), 129.8, 138.8, 139.0, 159.0, 159.5, 168.4, 170.1.                                                                    |
| HRMS (ESI)          | calcd for C <sub>22</sub> H <sub>21</sub> F <sub>3</sub> N <sub>4</sub> O <sub>5</sub> P 509.1196, found 509.1206 [MH] <sup>+</sup>                                                                                                                                                    |
| <b>112a</b>         |                                                                                                                                                                                                    |
| <sup>1</sup> H NMR  | (400 MHz, DMSO- <i>d</i> <sub>6</sub> ) δ 7.11-7.16 (m, 4H), 7.25 (tt, <i>J</i> = 7.4, 1.1 Hz, 1H), 7.44-7.49 (m, 2H), 7.82 (d, <i>J</i> = 8.8 Hz, 2H), 12.94 (s, 1H).                                                                                                                 |
| <sup>13</sup> C NMR | (100 MHz, DMSO- <i>d</i> <sub>6</sub> ) δ 117.7, 118.2, 119.8, 124.7, 128.2, 130.4, 155.1, 156.9, 160.0, 160.2.                                                                                                                                                                        |
| HRMS (ESI)          | calcd for C <sub>14</sub> H <sub>10</sub> N <sub>2</sub> O <sub>3</sub> 255.0784, found 255.0785 [MH] <sup>+</sup>                                                                                                                                                                     |
| <b>113b</b>         |                                                                                                                                                                                                    |
| <sup>1</sup> H NMR  | (600 MHz, acetone- <i>d</i> <sub>6</sub> ) δ 2.66 (s, 3H), 7.25 (d, <i>J</i> = 8.8 Hz, 2H), 7.27 (d, <i>J</i> = 8.5 Hz, 2H), 7.78 (d, <i>J</i> = 8.5 Hz, 2H), 8.11 (d, <i>J</i> = 8.8 Hz, 2H).                                                                                         |
| <sup>13</sup> C NMR | (150 MHz, acetone- <i>d</i> <sub>6</sub> ) δ 12.3, 120.0, 120.7, 124.1, 125.4 (q, <i>J</i> <sub>CF</sub> = 271.0 Hz), 126.1 (q, <i>J</i> <sub>CF</sub> = 32.5 Hz), 128.4 (q, <i>J</i> <sub>CF</sub> = 3.7 Hz), 130.2, 159.4, 160.8 (q, <i>J</i> <sub>CF</sub> = 1.5 Hz), 168.5, 178.2. |
| HRMS (ESI)          | calcd for C <sub>16</sub> H <sub>12</sub> F <sub>3</sub> N <sub>2</sub> O <sub>2</sub> 321.0845, found 321.0847 [MH] <sup>+</sup>                                                                                                                                                      |

|                     |                                                                                                                                                                                        |
|---------------------|----------------------------------------------------------------------------------------------------------------------------------------------------------------------------------------|
| <b>114a</b>         | 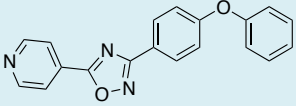                                                                                                     |
| <sup>1</sup> H NMR  | (400 MHz, CDCl <sub>3</sub> ) δ 7.09-7.12 (m, 4H), 7.20 (t, <i>J</i> = 7.5 Hz, 1H), 7.48-7.43 (m, 2H), 8.06 (d, <i>J</i> = 6.1 Hz, 2H), 8.13 (m, 2H), 8.89 (d, <i>J</i> = 6.1 Hz, 2H). |
| <sup>13</sup> C NMR | (100 MHz, CDCl <sub>3</sub> ) δ 118.6, 120.1, 121.0, 121.7, 124.5, 129.6, 130.2, 148.8, 151.1 (2C), 156.1, 160.8, 169.2.                                                               |
| HRMS (ESI)          | calcd for C <sub>19</sub> H <sub>13</sub> N <sub>3</sub> O <sub>2</sub> 316.1081, found 316.1103 [MH] <sup>+</sup>                                                                     |
| <b>115a</b>         |                                                                                                      |
| <sup>1</sup> H NMR  | (400 MHz, DMSO- <i>d</i> <sub>6</sub> ) δ 7.09-7.28 (m, 5H), 7.39-7.55 (m, 2H), 7.94-8.20 (m, 4H), 8.43 (m, 2H).                                                                       |
| <sup>13</sup> C NMR | (100 MHz, DMSO- <i>d</i> <sub>6</sub> ) δ 118.3, 119.8, 120.3, 124.5, 125.2, 129.2, 130.3, 140.0, 151.1, 155.2, 160.0, 168.0, 172.7.                                                   |
| HRMS (ESI)          | calcd for C <sub>19</sub> H <sub>13</sub> N <sub>3</sub> O <sub>3</sub> 332.1030, found 332.1028 [MH] <sup>+</sup>                                                                     |
| <b>116b</b>         |                                                                                                     |
| <sup>1</sup> H NMR  | (400 MHz, DMSO- <i>d</i> <sub>6</sub> ) δ 7.09 (d, <i>J</i> = 7.2 Hz, 4H), 7.54 (d, <i>J</i> = 7.2 Hz, 2H), 7.71 (d, <i>J</i> = 6.8 Hz, 2H), 8.77 (s, 1H).                             |
| <sup>13</sup> C NMR | (100 MHz, DMSO- <i>d</i> <sub>6</sub> ) δ 117.8, 120.6, 120.7, 121.5, 123.4, 123.6, 123.9, 126.1, 128.0 (q, <i>J</i> <sub>CF</sub> = 3.1 Hz), 137.4, 149.7, 153.3, 161.8.              |
| HRMS (ESI)          | calcd for C <sub>17</sub> H <sub>11</sub> F <sub>3</sub> N <sub>5</sub> O <sub>2</sub> 374.0859, found 374.0859 [MH] <sup>+</sup>                                                      |
| <b>117b</b>         |                                                                                                    |
| <sup>1</sup> H NMR  | (400 MHz, DMSO- <i>d</i> <sub>6</sub> ) δ 7.29-7.33 (m, 4H), 7.81 (d, <i>J</i> = 8.8 Hz, 2H), 8.13-8.16 (m, 2H), 8.99 (d, <i>J</i> = 7.2, 1H).                                         |
| <sup>13</sup> C NMR | (100 MHz, DMSO- <i>d</i> <sub>6</sub> ) δ 120.0, 120.4, 122.5, 124.9, 125.2, 126.2, 128.3 (q, <i>J</i> <sub>CF</sub> = 3.6), 130.1, 159.0, 159.8, 159.8, 168.2, 170.1.                 |
| HRMS (ESI)          | calcd for C <sub>11</sub> H <sub>11</sub> F <sub>3</sub> N <sub>5</sub> O <sub>2</sub> 374.0859, found 374.0831 [MH] <sup>+</sup>                                                      |
| <b>119c</b>         |                                                                                                    |

|                     |                                                                                                                                                                                                                      |
|---------------------|----------------------------------------------------------------------------------------------------------------------------------------------------------------------------------------------------------------------|
| <sup>1</sup> H NMR  | (400 MHz, CDCl <sub>3</sub> ) δ 1.37 (s, 3H), 1.39 (s, 3H), 3.10-3.17 (m, 1H), 6.82 (s, 1H), 6.83-7.12 (m, 5H), 8.13-8.16 (m, 2H), 10.76 (br s, 1H).                                                                 |
| <sup>13</sup> C NMR | (100 MHz, DMSO- <i>d</i> <sub>6</sub> ) δ 103.7, 116.7, 116.9, 117.9, 121.4, 121.6, 121.7, 129.5, 151.8, 151.9, 153.1, 158.3, 160.6, 160.7, 168.3, 171.1.                                                            |
| HRMS (ESI)          | calcd for C <sub>20</sub> H <sub>18</sub> FN <sub>4</sub> O <sub>2</sub> 365.1408, found 365.1429 [MH] <sup>+</sup>                                                                                                  |
| <b>120b</b>         | 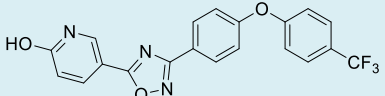                                                                                                                                   |
| <sup>1</sup> H NMR  | (400 MHz, DMSO- <i>d</i> <sub>6</sub> ) δ 6.54 (d, <i>J</i> = 9.6 Hz, 1H), 7.27-7.30 (m, 4H), 7.80 (d, <i>J</i> = 8.4 Hz, 2H), 8.01-8.04 (m, 1H), 8.08-8.11 (m, 2H), 8.35 (d, <i>J</i> = 2.8 Hz, 1H), 12.46 (s, 1H). |
| <sup>13</sup> C NMR | (100 MHz, DMSO- <i>d</i> <sub>6</sub> ) δ 102.6, 119.2, 119.8, 120.7, 122.1, 124.1, 124.5, 127.7 (q, <i>J</i> <sub>CF</sub> = 4.0 Hz), 129.4, 138.0, 139.4, 158.1, 159.2, 162.0, 167.3, 173.5.                       |
| HRMS (ESI)          | calcd for C <sub>20</sub> H <sub>13</sub> FN <sub>3</sub> O <sub>3</sub> 400.0904, found 400.0892 [MH] <sup>+</sup>                                                                                                  |
| <b>120c</b>         |                                                                                                                                   |
| <sup>1</sup> H NMR  | (400 MHz, DMSO- <i>d</i> <sub>6</sub> ) δ 6.52-6.55 (m, 1H), 7.11-7.14 (m, 2H), 7.19-7.22 (m, 2H), 7.27-7.32 (m, 2H), 8.00-8.05 (m, 3H), 8.34 (d, <i>J</i> = 2.0 Hz, 1H), 12.45 (s, 1H).                             |
| <sup>13</sup> C NMR | (100 MHz, DMSO- <i>d</i> <sub>6</sub> ) δ 102.6, 116.8, 117.0, 117.8, 120.7, 121.8, 121.9, 129.2, 138.0, 139.3, 151.2, 151.3, 157.6, 160.0, 160.1, 162.0, 167.4, 173.3.                                              |
| HRMS (ESI)          | calcd for C <sub>19</sub> H <sub>13</sub> FN <sub>3</sub> O <sub>3</sub> 350.0935, found 350.0935 [MH] <sup>+</sup>                                                                                                  |
| <b>121b</b>         |                                                                                                                                  |
| <sup>1</sup> H NMR  | (400 MHz, DMSO- <i>d</i> <sub>6</sub> ) δ 5.56 (s, 2H), 7.02 (d, <i>J</i> = 2.4 Hz, 1H), 7.28-7.30 (m, 4H), 7.64 (d, <i>J</i> = 1.6 Hz, 1H), 7.80 (d, <i>J</i> = 8.4 Hz, 2H), 8.08-8.11 (m, 2H), 12.10 (s, 1H).      |
| <sup>13</sup> C NMR | (100 MHz, DMSO- <i>d</i> <sub>6</sub> ) δ 104.7, 106.3, 119.9, 120.4, 123.0, 123.5, 124.5, 124.8, 125.2, 126.2, 128.3 (q, <i>J</i> <sub>CF</sub> = 3.8 Hz), 130.0, 139.9, 158.5, 158.8, 159.9, 167.9, 175.0.         |
| HRMS (ESI)          | calcd for C <sub>20</sub> H <sub>14</sub> F <sub>3</sub> N <sub>4</sub> O <sub>3</sub> 415.1013, found 415.0997 [MH] <sup>+</sup>                                                                                    |



|                     |                                                                                                                                                                                                                     |
|---------------------|---------------------------------------------------------------------------------------------------------------------------------------------------------------------------------------------------------------------|
| <b>121c</b>         | 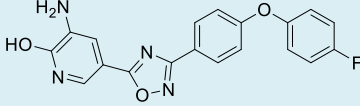                                                                                                                                  |
| <sup>1</sup> H NMR  | (400 MHz, DMSO- <i>d</i> <sub>6</sub> ) δ 5.55 (s, 2H), 7.01 (d, <i>J</i> = 2.4 Hz, 1H), 7.10-7.13 (m, 2H), 7.18-7.22 (m, 2H), 7.23-7.32 (m, 2H), 7.62 (d, <i>J</i> = 2.0 Hz, 1H), 8.01-8.04 (m, 2H).               |
| <sup>13</sup> C NMR | (100 MHz, DMSO- <i>d</i> <sub>6</sub> ) δ 104.0, 105.6, 116.8, 117.0, 117.8, 120.6, 121.8, 121.9, 139.2, 151.2, 151.3, 157.6, 157.8, 160.0, 160.1, 167.3, 174.2.                                                    |
| HRMS (ESI)          | calcd for C <sub>19</sub> H <sub>14</sub> FN <sub>4</sub> O <sub>3</sub> 365.1044, found 365.1031 [MH] <sup>+</sup>                                                                                                 |
| <b>122b</b>         |                                                                                                                                   |
| <sup>1</sup> H NMR  | (400 MHz, CDCl <sub>3</sub> ) δ 4.01 (br, 2H), 7.14-7.19 (m, 4H), 7.63-7.65 (m, 2H), 7.73-7.74 (m, 1H), 8.17-8.20 (m, 2H), 8.31 (d, <i>J</i> = 2.4 Hz, 1H), 8.83 (d, <i>J</i> = 1.6 Hz, 1H).                        |
| <sup>13</sup> C NMR | (100 MHz, CDCl <sub>3</sub> ) δ 119.1, 119.7, 120.8, 122.7, 125.6, 125.9, 127.6 (q, <i>J</i> <sub>CF</sub> = 3.0 Hz), 129.8, 139.1, 141.1, 142.8, 158.9, 159.5, 168.5, 174.4.                                       |
| HRMS (ESI)          | calcd for C <sub>20</sub> H <sub>14</sub> F <sub>3</sub> N <sub>4</sub> O <sub>2</sub> 399.1063, found 399.1057 [MH] <sup>+</sup>                                                                                   |
| <b>122c</b>         |                                                                                                                                 |
| <sup>1</sup> H NMR  | (400 MHz, CDCl <sub>3</sub> ) δ 3.99 (br, 2H), 7.05-7.12 (m, 6H), 7.72-7.73 (m, 1H), 8.10-8.14 (m, 2H), 8.30 (d, <i>J</i> = 2.4 Hz, 1H), 8.82 (d, <i>J</i> = 1.6 Hz, 1H).                                           |
| <sup>13</sup> C NMR | (100 MHz, DMSO- <i>d</i> <sub>6</sub> ) δ 116.7, 117.0, 118.0, 119.7, 120.9, 121.4, 121.6, 121.7, 129.6, 139.2, 141.1, 142.8, 151.9, 160.8, 160.9, 168.7, 174.3.                                                    |
| HRMS (ESI)          | calcd for C <sub>19</sub> H <sub>14</sub> FN <sub>4</sub> O <sub>2</sub> 349.1095, found 349.1098 [MH] <sup>+</sup>                                                                                                 |
| <b>123b</b>         |                                                                                                                                 |
| <sup>1</sup> H NMR  | (400 MHz, DMSO- <i>d</i> <sub>6</sub> ) δ 7.29-7.36 (m, 4H), 7.43-7.46 (m, 1H), 7.54-7.58 (m, 1H), 7.76-7.82 (m, 3H), 8.23-8.25 (m, 2H), 8.34 (d, <i>J</i> = 8.4 Hz, 1H).                                           |
| <sup>13</sup> C NMR | (100 MHz, DMSO- <i>d</i> <sub>6</sub> ) δ 111.4, 119.1, 119.9, 120.5, 121.4, 122.2, 123.4, 124.1, 124.4, 127.4, 127.6 (q, <i>J</i> <sub>CF</sub> = 3.6 Hz), 129.5, 129.8, 141.0, 158.1, 159.2, 159.3, 167.4, 170.9. |
| HRMS (ESI)          | calcd for C <sub>22</sub> H <sub>14</sub> F <sub>3</sub> N <sub>4</sub> O <sub>2</sub> 423.1063, found 423.1050 [MH] <sup>+</sup>                                                                                   |

|                     |                                                                                                                                                                                                                                     |
|---------------------|-------------------------------------------------------------------------------------------------------------------------------------------------------------------------------------------------------------------------------------|
| <b>123c</b>         | 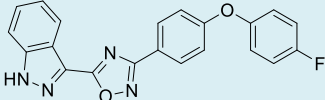                                                                                                                                                  |
| <sup>1</sup> H NMR  | (400 MHz, DMSO- <i>d</i> <sub>6</sub> ) δ 7.17–7.24 (m, 4H), 7.29–7.34 (m, 2H), 7.42–7.46 (m, 1H), 7.54–7.76 (m, 1H), 7.77 (d, <i>J</i> = 8.4 Hz, 1H), 8.17–8.19 (m, 2H), 8.33 (d, <i>J</i> = 8.4 Hz, 1H).                          |
| <sup>13</sup> C NMR | (100 MHz, DMSO- <i>d</i> <sub>6</sub> ) δ 111.4, 116.8, 117.0, 117.9, 120.5, 120.8, 121.4, 121.7, 121.8, 123.4, 127.4, 129.3, 129.9, 141.0, 151.3, 151.4, 157.6, 160.0, 160.1, 167.5, 170.8.                                        |
| HRMS (ESI)          | calcd for C <sub>21</sub> H <sub>14</sub> FN <sub>4</sub> O <sub>2</sub> 373.1095, found 373.1112 [MH] <sup>+</sup>                                                                                                                 |
| <b>124a</b>         |                                                                                                                                                   |
| <sup>1</sup> H NMR  | (400 MHz, CDCl <sub>3</sub> ) δ 7.09–7.13 (m, 4H), 7.19 (tt, <i>J</i> = 7.4, 1.1 Hz, 1H), 7.40 (dd, <i>J</i> = 8.6, 8.4 Hz, 2H), 7.66 (d, <i>J</i> = 8.8 Hz, 1H), 8.16 (d, <i>J</i> = 8.8 Hz, 2H), 8.24–8.27 (m, 2H), 8.72 (s, 1H). |
| <sup>13</sup> C NMR | (100 MHz, CDCl <sub>3</sub> ) δ 110.8, 118.0, 118.6, 120.0, 121.8, 122.9, 123.6, 124.4, 126.7, 129.5, 130.2, 136.7, 141.7, 156.4, 160.4, 168.7, 176.1.                                                                              |
| HRMS (ESI)          | calcd for C <sub>21</sub> H <sub>14</sub> N <sub>4</sub> O <sub>2</sub> 377.1009, found 377.1012 [MNa] <sup>+</sup>                                                                                                                 |
| <b>125b</b>         |                                                                                                                                                 |
| <sup>1</sup> H NMR  | (400 MHz, CDCl <sub>3</sub> ) δ 7.15–7.21 (m, 4H), 7.41–7.44 (m, 1H), 7.65 (d, <i>J</i> = 8.4 Hz, 2H), 8.23–8.26 (m, 2H), 8.35 (s, 1H), 8.52–8.54 (m, 1H), 8.76–8.78 (m, 1H).                                                       |
| <sup>13</sup> C NMR | (100 MHz, DMSO- <i>d</i> <sub>6</sub> ) δ 98.7, 116.9, 118.1, 119.1, 119.9, 122.6, 124.0, 124.4, 127.7 (q, <i>J</i> <sub>CF</sub> = 3.0 Hz), 128.7, 129.4, 131.4, 144.7, 148.8, 157.9, 159.4, 167.1, 172.6.                         |
| HRMS (ESI)          | calcd for C <sub>22</sub> H <sub>14</sub> F <sub>3</sub> N <sub>4</sub> O <sub>2</sub> 423.1063, found 423.1082 [MH] <sup>+</sup>                                                                                                   |
| <b>125c</b>         |                                                                                                                                                 |

|                     |                                                                                                                                                                                                                                                                          |
|---------------------|--------------------------------------------------------------------------------------------------------------------------------------------------------------------------------------------------------------------------------------------------------------------------|
| <sup>1</sup> H NMR  | (400 MHz, DMSO- <i>d</i> <sub>6</sub> ) δ 7.13-7.16 (m, 2H), 7.19-7.23 (m, 2H), 7.28-7.33 (m, 2H), 7.35-7.38 (m, 1H), 8.11 (d, <i>J</i> = 2.4 Hz, 1H), 8.14 (s, 1H), 8.42-8.43 (m, 1H), 8.55 (d, <i>J</i> = 8.0 Hz, 1H), 8.60 (d, <i>J</i> = 2.4 Hz, 1H), 12.87 (s, 1H). |
| <sup>13</sup> C NMR | (100 MHz, DMSO- <i>d</i> <sub>6</sub> ) δ 98.7, 116.7, 116.8, 117.0, 117.9, 118.0, 121.2, 121.7, 121.8, 128.6, 129.2, 131.3, 144.7, 148.8, 151.4 (2C), 157.6, 159.9, 160.0, 167.2, 172.5.                                                                                |
| HRMS (ESI)          | calcd for C <sub>21</sub> H <sub>14</sub> FN <sub>4</sub> O <sub>2</sub> 373.1095, found 373.1093 [MH] <sup>+</sup>                                                                                                                                                      |
| <b>126c</b>         | 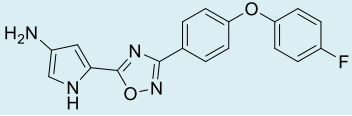                                                                                                                                                                                       |
| <sup>1</sup> H NMR  | (400 MHz, CDCl <sub>3</sub> ) δ 3.21 (br s, 2H), 6.61 (s, 1H), 6.69 (s, 1H), 7.02-7.09 (m, 6H), 8.01-8.06 (m, 2H), 9.01 (s, 1H).                                                                                                                                         |
| <sup>13</sup> C NMR | (100 MHz, CDCl <sub>3</sub> ) δ 106.1, 111.1, 115.6, 116.7, 116.9, 118.0, 121.5, 121.6, 121.7, 129.3, 129.4, 133.8, 151.9, 158.4, 160.6, 160.7, 167.8, 169.5.                                                                                                            |
| HRMS (ESI)          | calcd for C <sub>18</sub> H <sub>14</sub> FN <sub>4</sub> O <sub>2</sub> 337.1095, found 337.1093 [MH] <sup>+</sup>                                                                                                                                                      |
| <b>127c</b>         |                                                                                                                                                                                       |
| <sup>1</sup> H NMR  | (400 MHz, CDCl <sub>3</sub> ) δ 6.40-6.43 (m, 1H), 7.03-7.16 (m, 7H), 8.06-8.10 (m, 2H), 9.34 (br s, 1H).                                                                                                                                                                |
| <sup>13</sup> C NMR | (100 MHz, CDCl <sub>3</sub> ) δ 111.6, 114.9, 116.7, 116.9, 117.3, 118.0, 121.5, 121.6, 121.7, 123.8, 129.5, 151.9, 152.0, 158.3, 160.6, 160.7, 167.9, 169.7.                                                                                                            |
| HRMS (ESI)          | calcd for C <sub>18</sub> H <sub>13</sub> FN <sub>3</sub> O <sub>2</sub> 322.0986, found 322.0984 [MH] <sup>+</sup>                                                                                                                                                      |
| <b>128a</b>         |                                                                                                                                                                                      |
| <sup>1</sup> H NMR  | (400 MHz, DMSO- <i>d</i> <sub>6</sub> ) δ 1.98-2.28 (m, 4H), 3.03-3.36 (m, 4H), 3.51 (m, 1H), 7.12-7.15 (m, 4H), 7.24 (tt, <i>J</i> = 7.4, 1.1 Hz), 7.47 (m, 2H), 8.01 (d, <i>J</i> = 8.9 Hz), 9.06 (m, 2H).                                                             |
| <sup>13</sup> C NMR | (100 MHz, DMSO- <i>d</i> <sub>6</sub> ) δ 25.55, 31.19, 41.97, 118.27, 119.77, 120.69, 124.57, 129.13, 130.34, 155.29, 159.80, 167.00, 180.81.                                                                                                                           |
| HRMS (ESI)          | calcd for C <sub>19</sub> H <sub>19</sub> N <sub>3</sub> O <sub>2</sub> 322.1550, found 322.1552 [MH] <sup>+</sup>                                                                                                                                                       |

|                     |                                                                                                                                                                                                                                                                      |
|---------------------|----------------------------------------------------------------------------------------------------------------------------------------------------------------------------------------------------------------------------------------------------------------------|
| <b>131a</b>         | 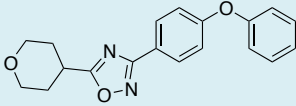                                                                                                                                                                                   |
| <sup>1</sup> H NMR  | (400 MHz, CDCl <sub>3</sub> ) δ 2.02-2.10 (m, 4H), 3.25 (m, 1H), 3.58 (m, 2H), 4.07 (m, 2H), 7.05-7.09 (m, 4H), 7.18 (tt, <i>J</i> = 7.4, 1.1 Hz, 1H), 7.39 (m, 2H), 8.04 (d, <i>J</i> = 8.9 Hz, 2H).                                                                |
| <sup>13</sup> C NMR | (100 MHz, CDCl <sub>3</sub> ) δ 29.6, 33.8, 67.1, 118.6, 119.9, 121.6, 124.4, 129.4, 130.2, 156.3, 160.3, 168.0, 181.4.                                                                                                                                              |
| HRMS (ESI)          | calcd for C <sub>19</sub> H <sub>18</sub> N <sub>2</sub> O <sub>3</sub> 323.1390, found 323.1403 [MH] <sup>+</sup>                                                                                                                                                   |
| <b>132a</b>         |                                                                                                                                                                                    |
| <sup>1</sup> H NMR  | (400 MHz, DMSO- <i>d</i> <sub>6</sub> ) δ 2.22 (s, 2H), 2.44 (s, 1H), 2.58 (s, 1H), 3.65 (m, 2H), 5.18, (s, 1H), 7.01-7.06 (m, 4H), 7.17 (t, <i>J</i> = 7.5 Hz, 1H), 7.37 (t, <i>J</i> = 7.8 Hz, 2H), 8.00 (d, <i>J</i> = 8.3 Hz, 2H), 10.23 (s, 1H), 11.14 (s, 1H). |
| <sup>13</sup> C NMR | (100 MHz, DMSO- <i>d</i> <sub>6</sub> ) δ 23.7, 30.1, 46.1, 54.0, 118.5, 120.0, 120.4, 124.5, 129.7, 130.2, 156.1, 160.7, 168.2, 174.2.                                                                                                                              |
| HRMS (ESI)          | calcd for C <sub>18</sub> H <sub>18</sub> N <sub>3</sub> O <sub>2</sub> 308.1394, found 308.1403 [MH] <sup>+</sup>                                                                                                                                                   |
| <b>133b</b>         |                                                                                                                                                                                  |
| <sup>1</sup> H NMR  | (500 MHz, CDCl <sub>3</sub> ) δ 2.43-2.53 (m, 2H), 2.57-2.64 (m, 1H), 2.68-2.76 (m, 1H), 5.05-5.06 (m, 1H), 6.83 (s, 1H), 7.12 (d, <i>J</i> = 8.5 Hz, 4H), 7.62 (d, <i>J</i> = 8.5 Hz, 2H), 8.07 (d, <i>J</i> = 8.5 Hz, 2H).                                         |
| <sup>13</sup> C NMR | (125 MHz, CDCl <sub>3</sub> ) δ 26.4, 29.1, 50.4, 119.1, 119.7, 122.2, 126.0, 126.3, 127.6 (q, <i>J</i> <sub>CF</sub> = 3.6 Hz), 129.8, 159.1, 159.4, 168.1, 178.0, 178.9.                                                                                           |
| <b>134b</b>         |                                                                                                                                                                                  |
| <sup>1</sup> H NMR  | (500 MHz, CDCl <sub>3</sub> ) δ 2.42-2.51 (m, 2H), 2.57-2.63 (m, 1H), 2.66-2.74 (m, 1H), 5.04-5.07 (m, 1H), 7.11 (d, <i>J</i> = 8.5 Hz, 4H), 7.62 (d, <i>J</i> = 8.5 Hz, 2H), 8.06 (d, <i>J</i> = 8.5 Hz, 2H).                                                       |
| <sup>13</sup> C NMR | (125 MHz, CDCl <sub>3</sub> ) δ 26.4, 29.2, 50.5, 119.1, 119.7, 122.3, 125.3, 126.0, 126.3, 127.5 (q, <i>J</i> <sub>CF</sub> = 3.5 Hz), 129.8, 159.1, 159.4, 168.1, 178.3, 179.0.                                                                                    |
| <b>135b</b>         |                                                                                                                                                                                  |

|                     |                                                                                                                                                                                                                                                                                                             |
|---------------------|-------------------------------------------------------------------------------------------------------------------------------------------------------------------------------------------------------------------------------------------------------------------------------------------------------------|
| <sup>1</sup> H NMR  | (400 MHz, DMSO- <i>d</i> <sub>6</sub> ) δ 6.40 (d, <i>J</i> = 1.6 Hz, 1H), 7.29-7.34 (m, 4H), 7.81 (d, <i>J</i> = 8.8 Hz, 2H), 8.13-8.15 (m, 2H), 11.56 (s, 1H), 11.87 (s, 1H).                                                                                                                             |
| HRMS (ESI)          | calcd for C <sub>19</sub> H <sub>11</sub> F <sub>3</sub> N <sub>4</sub> O <sub>4</sub> 417.0805, found 417.0805 [MH] <sup>+</sup>                                                                                                                                                                           |
| <b>136a</b>         | 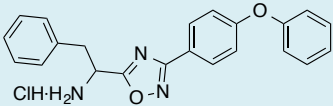                                                                                                                                                                                                                          |
| <sup>1</sup> H NMR  | (400 MHz, DMSO- <i>d</i> <sub>6</sub> ) δ 3.29-3.33 (m, 1H), 3.50-3.54 (m, 1H), 5.15-5.18 (m, 1H), 7.13-7.16 (m, 4H), 7.21-7.32 (m, 6H), 7.47 (t, <i>J</i> = 8.3 Hz, 2H), 7.99 (d, <i>J</i> = 8.6 Hz, 2H), 9.34 (s, 3H).                                                                                    |
| <sup>13</sup> C NMR | (100 MHz, DMSO- <i>d</i> <sub>6</sub> ) δ 37.3, 48.0, 118.3, 119.9, 124.6, 127.4, 128.6, 129.2, 129.3, 130.3, 134.2, 155.1, 160.1, 167.1, 175.8.                                                                                                                                                            |
| HRMS (ESI)          | calcd for C <sub>22</sub> H <sub>20</sub> N <sub>3</sub> O <sub>2</sub> 358.1550, found 358.1547 [MH] <sup>+</sup>                                                                                                                                                                                          |
| <b>137a</b>         |                                                                                                                                                                                                                           |
| <sup>1</sup> H NMR  | (600 MHz, DMSO- <i>d</i> <sub>6</sub> ) δ 1.49 (quint, <i>J</i> = 7.4 Hz, 2H), 1.81 (quint, <i>J</i> = 7.4 Hz, 2H), 2.63 (t, <i>J</i> = 7.4 Hz, 2H), 3.00 (t, <i>J</i> = 7.4 Hz, 2H), 7.12-7.14 (m, 4H), 7.24 (t, <i>J</i> = 7.4 Hz, 1H), 7.46 (t, <i>J</i> = 7.4 Hz, 2H), 8.00 (d, <i>J</i> = 8.8 Hz, 2H). |
| <sup>13</sup> C NMR | (150 MHz, DMSO- <i>d</i> <sub>6</sub> ) δ 23.3, 25.6, 30.5, 40.1, 118.3, 119.7, 120.9, 124.5, 129.1, 130.3, 155.3, 159.7, 167.0, 180.2.                                                                                                                                                                     |
| HRMS (ESI)          | calcd for C <sub>18</sub> H <sub>20</sub> N <sub>3</sub> O <sub>2</sub> 310.1550, found 310.1523 [MH] <sup>+</sup>                                                                                                                                                                                          |

**Table S2. Minimal-Inhibitory concentrations (MICs)**

| Compound Number | <i>E. faecium</i><br>NCTC 7171 | <i>S. aureus</i><br>ATCC 29213 |
|-----------------|--------------------------------|--------------------------------|
|                 | MIC (μg/mL)                    | MIC (μg/mL)                    |
| <b>57a</b>      | 1                              | 1                              |
| <b>57b</b>      | 1                              | 1                              |
| <b>57c</b>      | 1                              | 1                              |
| <b>58a</b>      | 2                              | 4                              |

|            |      |      |
|------------|------|------|
| <b>58b</b> | 2    | 1    |
| <b>58c</b> | >128 | >128 |
| <b>59b</b> | 2    | 1    |
| <b>60a</b> | >128 | 1    |
| <b>60c</b> | 8    | 0.5  |
| <b>60b</b> | 2    | 1    |
| <b>61a</b> | 16   | 1    |
| <b>61b</b> | >128 | 1    |
| <b>62a</b> | 32   | 1    |
| <b>62b</b> | 32   | 2    |
| <b>63a</b> | 4    | 2    |
| <b>63b</b> | 2    | 2    |
| <b>63c</b> | 4    | 1    |
| <b>64a</b> | 32   | 16   |
| <b>64b</b> | 16   | 4    |
| <b>64c</b> | 32   | 16   |
| <b>65a</b> | >128 | 0.5  |
| <b>65b</b> | >128 | 0.5  |
| <b>66b</b> | >128 | 0.25 |
| <b>67b</b> | >128 | 2    |
| <b>68b</b> | 128  | 4    |
| <b>69b</b> | 128  | 2    |
| <b>69c</b> | 8    | 4    |
| <b>70a</b> | 4    | 4    |

|            |      |      |
|------------|------|------|
| <b>70b</b> | 2    | 2    |
| <b>70c</b> | 2    | 2    |
| <b>71b</b> | 2    | 2    |
| <b>71c</b> | 4    | 8    |
| <b>72a</b> | >32  | >128 |
| <b>72b</b> | 2    | 2    |
| <b>73a</b> | 4    | 8    |
| <b>73b</b> | 4    | 4    |
| <b>74a</b> | 8    | 8    |
| <b>75a</b> | 2    | 2    |
| <b>75b</b> | 2    | 4    |
| <b>75c</b> | 2    | 2    |
| <b>76b</b> | 4    | 2    |
| <b>76c</b> | 128  | >128 |
| <b>77b</b> | 4    | 8    |
| <b>77c</b> | 4    | 8    |
| <b>78b</b> | 64   | 8    |
| <b>78c</b> | 128  | >128 |
| <b>79a</b> | >128 | 8    |
| <b>80a</b> | -    | >128 |
| <b>80b</b> | -    | >128 |
| <b>81b</b> | -    | >128 |
| <b>81c</b> | >128 | >128 |
| <b>82a</b> | >32  | >32  |

|             |      |      |
|-------------|------|------|
| <b>82b</b>  | -    | >128 |
| <b>83b</b>  | -    | 256  |
| <b>84c</b>  | 32   | >128 |
| <b>85c</b>  | >128 | >128 |
| <b>86b</b>  | 32   | >128 |
| <b>87b</b>  | 128  | >128 |
| <b>87c</b>  | >128 | >128 |
| <b>88c</b>  | 64   | >128 |
| <b>89c</b>  | 128  | >128 |
| <b>90c</b>  | >128 | >128 |
| <b>91c</b>  | >128 | >128 |
| <b>92c</b>  | 128  | >128 |
| <b>93b</b>  | >128 | >128 |
| <b>94a</b>  | >128 | >128 |
| <b>95a</b>  | >128 | >128 |
| <b>96a</b>  | 32   | >128 |
| <b>97a</b>  | >128 | >128 |
| <b>98a</b>  | >128 | >128 |
| <b>99a</b>  | 128  | >128 |
| <b>99b</b>  | >128 | >128 |
| <b>99c</b>  | >128 | >128 |
| <b>100a</b> | >128 | >128 |
| <b>101b</b> | >128 | >128 |
| <b>101c</b> | >128 | >128 |



|             |      |      |
|-------------|------|------|
| <b>102b</b> | 64   | >128 |
| <b>102c</b> | 32   | >128 |
| <b>103b</b> | >128 | >128 |
| <b>104b</b> | >128 | >128 |
| <b>105b</b> | 128  | >128 |
| <b>106b</b> | 128  | >128 |
| <b>107b</b> | >128 | >128 |
| <b>108b</b> | 16   | >128 |
| <b>109b</b> | >128 | >128 |
| <b>110b</b> | >128 | >128 |
| <b>111b</b> | >128 | >128 |
| <b>112a</b> | >128 | >128 |
| <b>113a</b> | -    | >128 |
| <b>114a</b> | 64   | >128 |
| <b>115a</b> | 64   | >128 |
| <b>116b</b> | >128 | >128 |
| <b>117b</b> | >128 | 16   |
| <b>118c</b> | >128 | >128 |
| <b>119c</b> | 64   | >128 |
| <b>120b</b> | 32   | >128 |
| <b>120c</b> | 64   | >128 |
| <b>121b</b> | 64   | >128 |
| <b>121c</b> | 128  | >128 |
| <b>122b</b> | >128 | >128 |

|             |      |      |
|-------------|------|------|
| <b>122c</b> | 128  | >128 |
| <b>123b</b> | >128 | >128 |
| <b>123c</b> | 16   | >128 |
| <b>124a</b> | 64   | >128 |
| <b>125b</b> | 32   | >128 |
| <b>125c</b> | 64   | >128 |
| <b>126c</b> | 64   | 128  |
| <b>127c</b> | >128 | >128 |
| <b>128a</b> | 16   | 32   |
| <b>129a</b> | >128 | >128 |
| <b>129c</b> | >128 | >128 |
| <b>130c</b> | >128 | >128 |
| <b>131a</b> | >128 | >128 |
| <b>132a</b> | 64   | 64   |
| <b>133b</b> | >128 | >128 |
| <b>134b</b> | >128 | >128 |
| <b>135b</b> | >128 | >128 |
| <b>136a</b> | >128 | >128 |
| <b>137a</b> | 32   | 64   |

## References

1. O'Daniel, P. I.; Peng, Z.; Pi, H.; Testero, S. A.; Ding, D.; Spink, E.; Leemans, E.; Boudreau, M. A.; Yamaguchi, T.; Schroeder, V. A.; Wolter, W. R.; Llarrull, L. I.; Song, W.; Lastochkin, E.; Kumarasiri, M.; Antunes, N. T.; Espahbodi, M.; Lichtenwalter, K.; Suckow, M. A.; Vakulenko, S.; Mobashery, S.; Chang, M. Discovery of a new class of non- $\beta$ -lactam inhibitors of penicillin-binding proteins with gram-positive antibacterial activity. *J. Am. Chem. Soc.* **2014**, *136*, 3664–3672.

2. Bellamy, F. D.; Ou, K. Selective reduction of aromatic nitro compounds with stannous chloride in non acidic and non aqueous medium. *Tetrahedron Lett.* **1984**, *25*, 839-842.
3. Yi, B.; Long, S.; González-Cestari, T. F.; Henderson, B. J.; Pavlovicz, R. E.; Werbovetz, K.; Li, C.; McKay, D. B. Discovery of benzamide analogs as negative allosteric modulators of human neuronal nicotinic receptors: Pharmacophore modeling and structure-activity relationship studies. *Bioorg. Med. Chem.* **2013**, *21*, 4730-4743.
4. Wilson, S. C.; Howard, P. W.; Thurston, D. E. Design and synthesis of a novel epoxide-containing pyrrolo[2,1-*c*][1,4]benzodiazepine (PBD) via a new cyclization procedure. *Tetrahedron Lett.* **1995**, *36*, 6333-6336.
5. Liu, K.-C.; Fang, J.-M.; Jan, J.-T.; Cheng, T.-J. R.; Wang, S.-Y.; Yang, S.-T.; Cheng, Y.-S. E.; Wong, C.-H. Enhanced anti-influenza agents conjugated with anti-inflammatory activity. *J. Med. Chem.* **2012**, *55*, 8493-8501.
6. Coppola, G. M.; Kukkola, P. J.; Stanton, J. L.; Neubert, A. D.; Marcopulos, N.; Bilci, N. A.; Wang, H.; Tomaselli, H. C.; Tan, J.; Aicher, T. D.; Knorr, D. C.; Jeng, A. Y.; Dardik, B.; Chatelain, R. E. Perhydroquinolylbenzamides as novel inhibitors of 11 $\beta$ -hydroxysteroid dehydrogenase type 1. *J. Med. Chem.* **2005**, *48*, 6696-6712.
7. Perez, M.; Lamothe, M.; Maraval, C.; Mirabel, E.; Loubat, C.; Planty, B.; Horn, C.; Michaux, J.; Marrot, S.; Letienne, R.; Pignier, C.; Bocquet, A.; Nadal-Wollbold, F.; Cussac, D.; de Vries, L.; Le Grand, B. Discovery of novel protease activated receptors 1 antagonists with potent antithrombotic activity in vivo. *J. Med. Chem.* **2009**, *52*, 5826-5836.
